# Supplementary material
Source: PubMed Central journal article supplement (PMC3778657)

# **Minimizing the Amount of Nitromethane in Palladium Catalyzed Cross Coupling with Aryl Halides**

*Ryan R. Walvoord and Marisa C. Kozlowski\**

Supporting Information

## **Table of Contents**

|                                           |       |
|-------------------------------------------|-------|
| General Methods                           | S2    |
| Parallel Microscale Experimentation Data  | S3-4  |
| NMR Spectra for Arylnitromethane Products | S5-28 |

## General Methods.

All commercial reagents were used as received without additional purification unless otherwise noted. Nitromethane was distilled from calcium hydride and stored at 0 °C away from light. Anhydrous 1,4-dioxane was purchased from Acros and used as received. Potassium phosphate (tribasic) was dried at 100 °C under vacuum overnight and stored in the glovebox. All purifications were performed via flash column chromatography using EM Reagents Silica Gel 60 (230-400). Analytical thin-layer chromatography (TLC) was performed using EM Reagents 0.25 mm silica gel 254-F plates. Visualization was accomplished with UV light and/or ceric ammonium molybdate stain. <sup>1</sup>H NMR and <sup>13</sup>C NMR chemical shifts are reported relative to the chloroform solvent resonance peak  $\delta$  7.27 for <sup>1</sup>H and  $\delta$  77.23 for <sup>13</sup>C. Data are reported as follows: chemical shift, multiplicity (s = singlet, d = doublet, t = triplet, q = quartet, bs = broad singlet, dd = doublet of doublets, td = triplet of doublets, tt = triplet of triplets, m = multiplet), coupling constants, and number of protons. Melting points are uncorrected. All yields refer to isolated yields, and product purity was determined by <sup>1</sup>H NMR spectroscopy.

## Parallel Microscale Experimentation Data

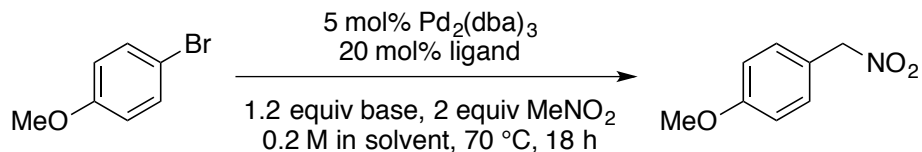

**96 well plate: 8 bases, 4 ligands, 3 solvents**

### Bases:

NaO*t*-Bu, K<sub>3</sub>PO<sub>4</sub>, Cs<sub>2</sub>CO<sub>3</sub>, K<sub>2</sub>CO<sub>3</sub>, Na<sub>2</sub>CO<sub>3</sub>, CsHCO<sub>3</sub>, KHCO<sub>3</sub>, NaHCO<sub>3</sub>

### Ligands:

XPhos, BrettPhos, JohnPhos, CataCXium POMetB

### Solvents:

THF, 1,4-dioxane, CPME

The ligands (4 μmol) were dosed into the 96-well reactor equipped with 1 mL vials as solutions (50 μL, 0.08 M) in 1,2-dichloroethane. Pd<sub>2</sub>dba<sub>3</sub> (1.0 μmol, 50 μL of a 0.02 M solution in benzene) was then added to the vials and the resulting solutions were evacuated to dryness on a JKem-blow-down block. Base (24 μmol, 25 mg/mL slurry in THF) was then added to the ligand/catalyst mixture, and the resulting mixture was evacuated to dryness on a JKem-blow-down block. A parylene stir-bar was added to each vial. Substrate/nitromethane/solvent solutions were prepared with 4-bromoanisole (0.2 M, 20 μmol/reaction) and nitromethane (0.4 M, 40 μmol/reaction) in the requisite solvent and then dosed in the reaction vials (100 μL reaction volume). The reactor block was sealed, removed from the glovebox and heated at 70 °C for 18 h on an Alligator tumble stirrer (500 rpm). After cooling to ambient temperature, the reactions were quenched *via* dilution with a solution of internal standard in MeCN (2 μmol biphenyl, 0.002M, 500 μL), and the contents were stirred. Into a separate 96-well plate LC block (Analytical Sales and Services, part # 17P687) was added 700 μL of MeCN and then 25 μL aliquots of the diluted reaction mixtures. The 96-well plate LC block was then sealed with a polypropylene 1 mL cap mat (Analytical Sales and Services, part # 96057). The

reaction mixtures were analyzed using an Agilent Technologies 1200 series HPLC with a 96-well plate auto-sampler. Assay conditions: Supelco Ascentis Express C18 100 mm x 4.6 mm or ZORBAX Eclipse XDB-C8, 4.6 x 50 mm, 1.8  $\mu$ m. MeCN with H<sub>2</sub>O + 0.1 % H<sub>3</sub>PO<sub>4</sub>. 1.8 mL/min; 10 % in MeCN to 95 % MeCN in 6 min, hold for 2 min. Post time 2 min. Column at 40 °C; 210 nm.

Bubble chart of the results: Bubble size corresponds to Product:Internal Standard ratio as determined by LC. Note: BrettPhos, CsHCO<sub>3</sub>, CPME was incorrectly dosed (excess SM and MeNO<sub>2</sub>) leading to an inaccurately high P/IS value.

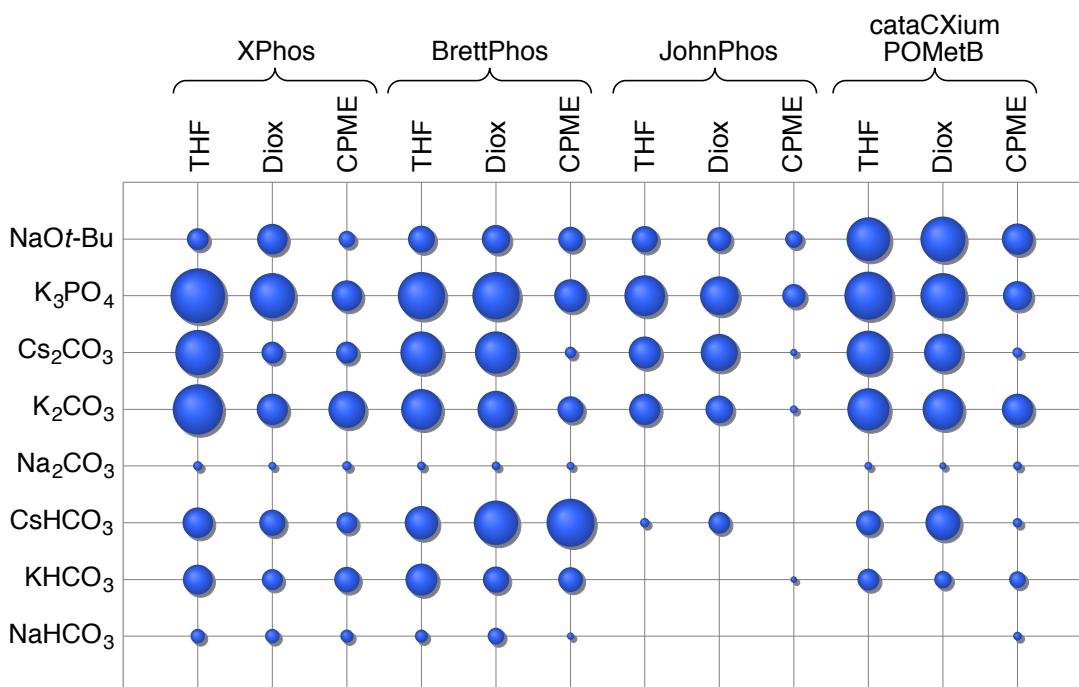

Top results based on P/IS ratios.

| Ligand          | Base                            | Solvent | P/IS  |
|-----------------|---------------------------------|---------|-------|
| Xphos           | K <sub>3</sub> PO <sub>4</sub>  | THF     | 5.854 |
| Xphos           | K <sub>2</sub> CO <sub>3</sub>  | THF     | 4.998 |
| cataCXiumPOMetB | K <sub>3</sub> PO <sub>4</sub>  | THF     | 4.567 |
| BrettPhos       | K <sub>3</sub> PO <sub>4</sub>  | THF     | 4.519 |
| BrettPhos       | K <sub>3</sub> PO <sub>4</sub>  | Diox    | 4.412 |
| Xphos           | Cs <sub>2</sub> CO <sub>3</sub> | THF     | 4.062 |
| cataCXiumPOMetB | K <sub>3</sub> PO <sub>4</sub>  | Diox    | 4.050 |
| Xphos           | K <sub>3</sub> PO <sub>4</sub>  | Diox    | 4.047 |
| cataCXiumPOMetB | NaOtBu                          | Diox    | 4.015 |

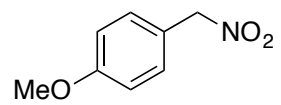

Table 2, entry 1

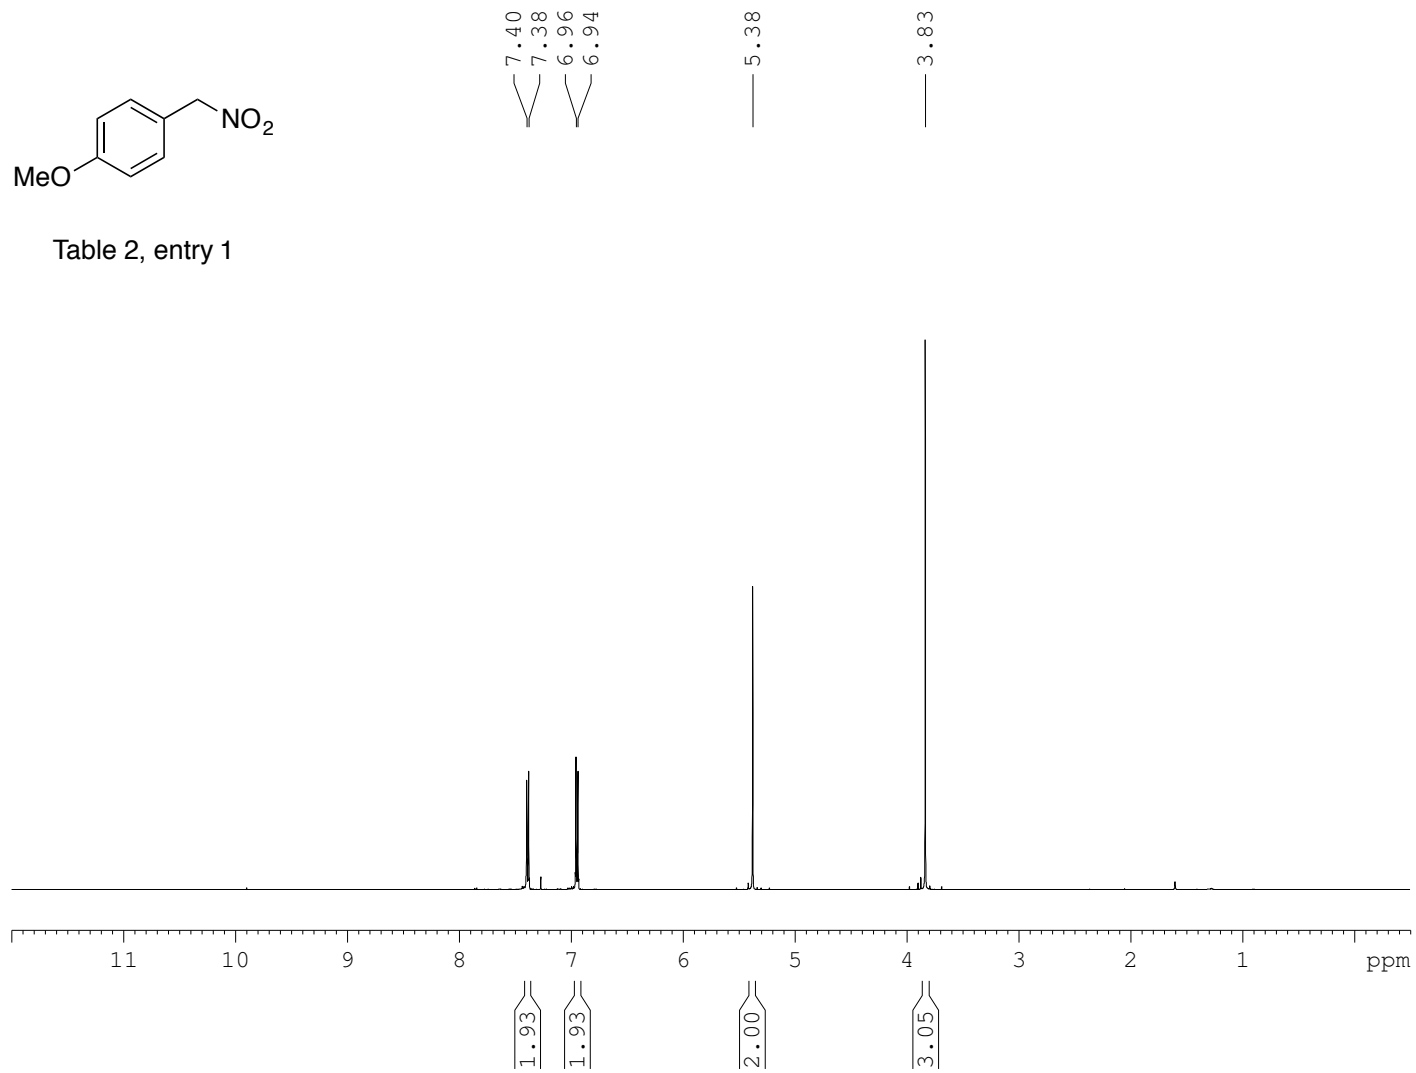

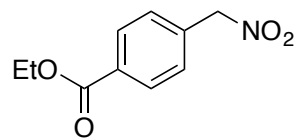

Table 2, entry 2

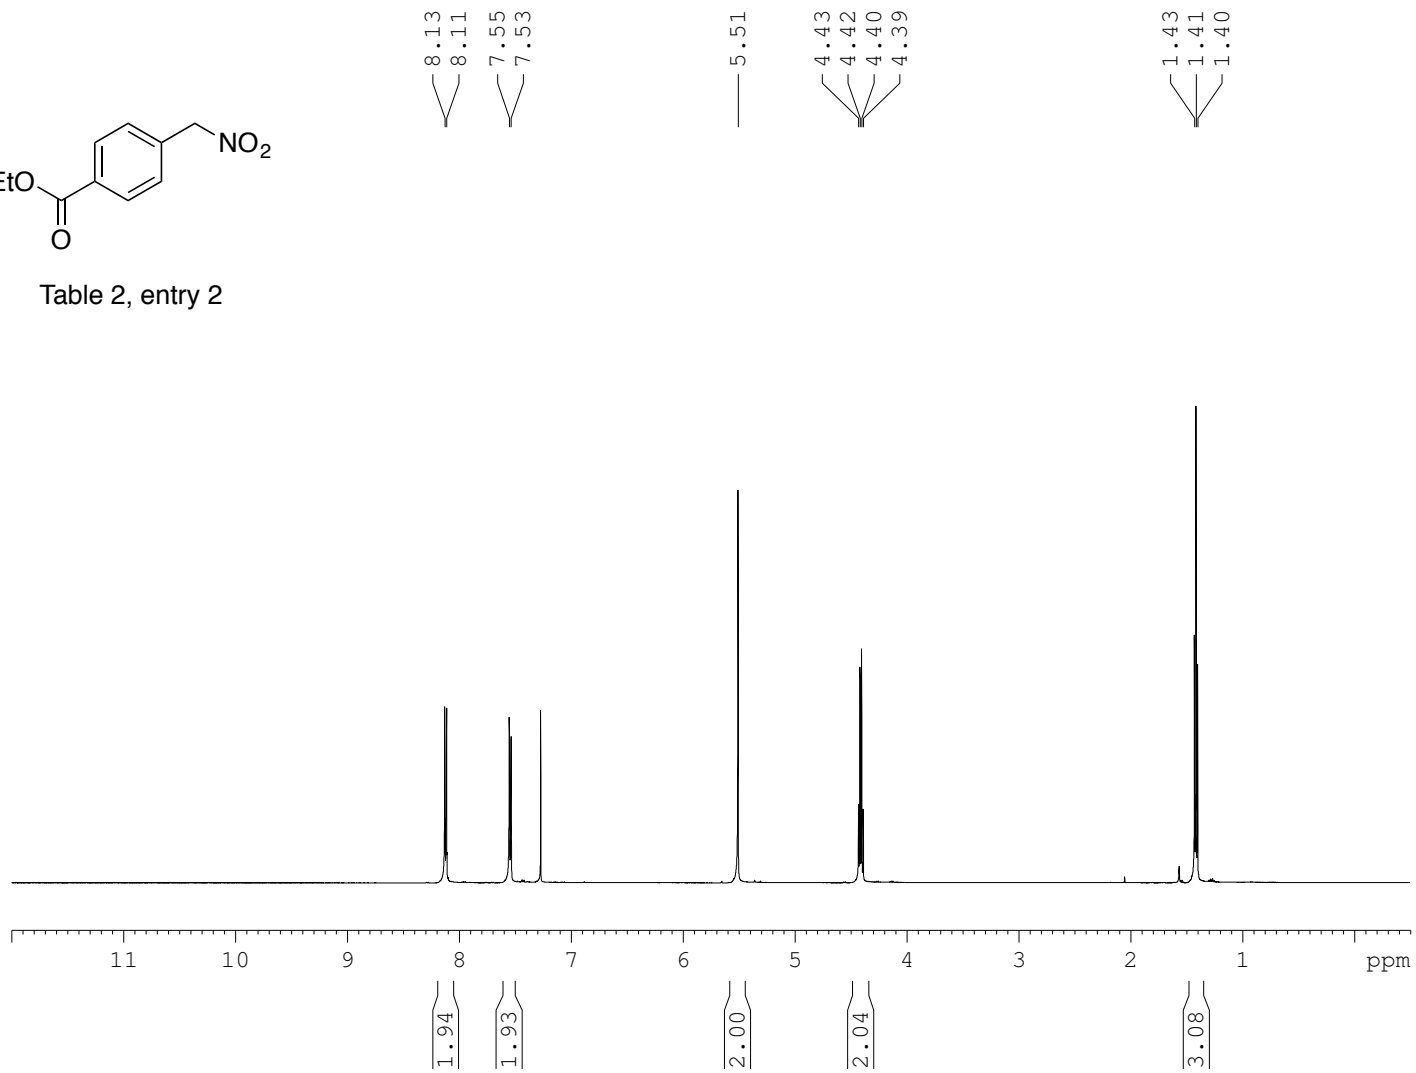

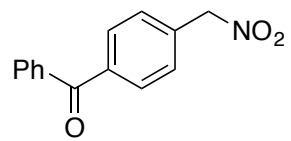

Table 2, entry 3

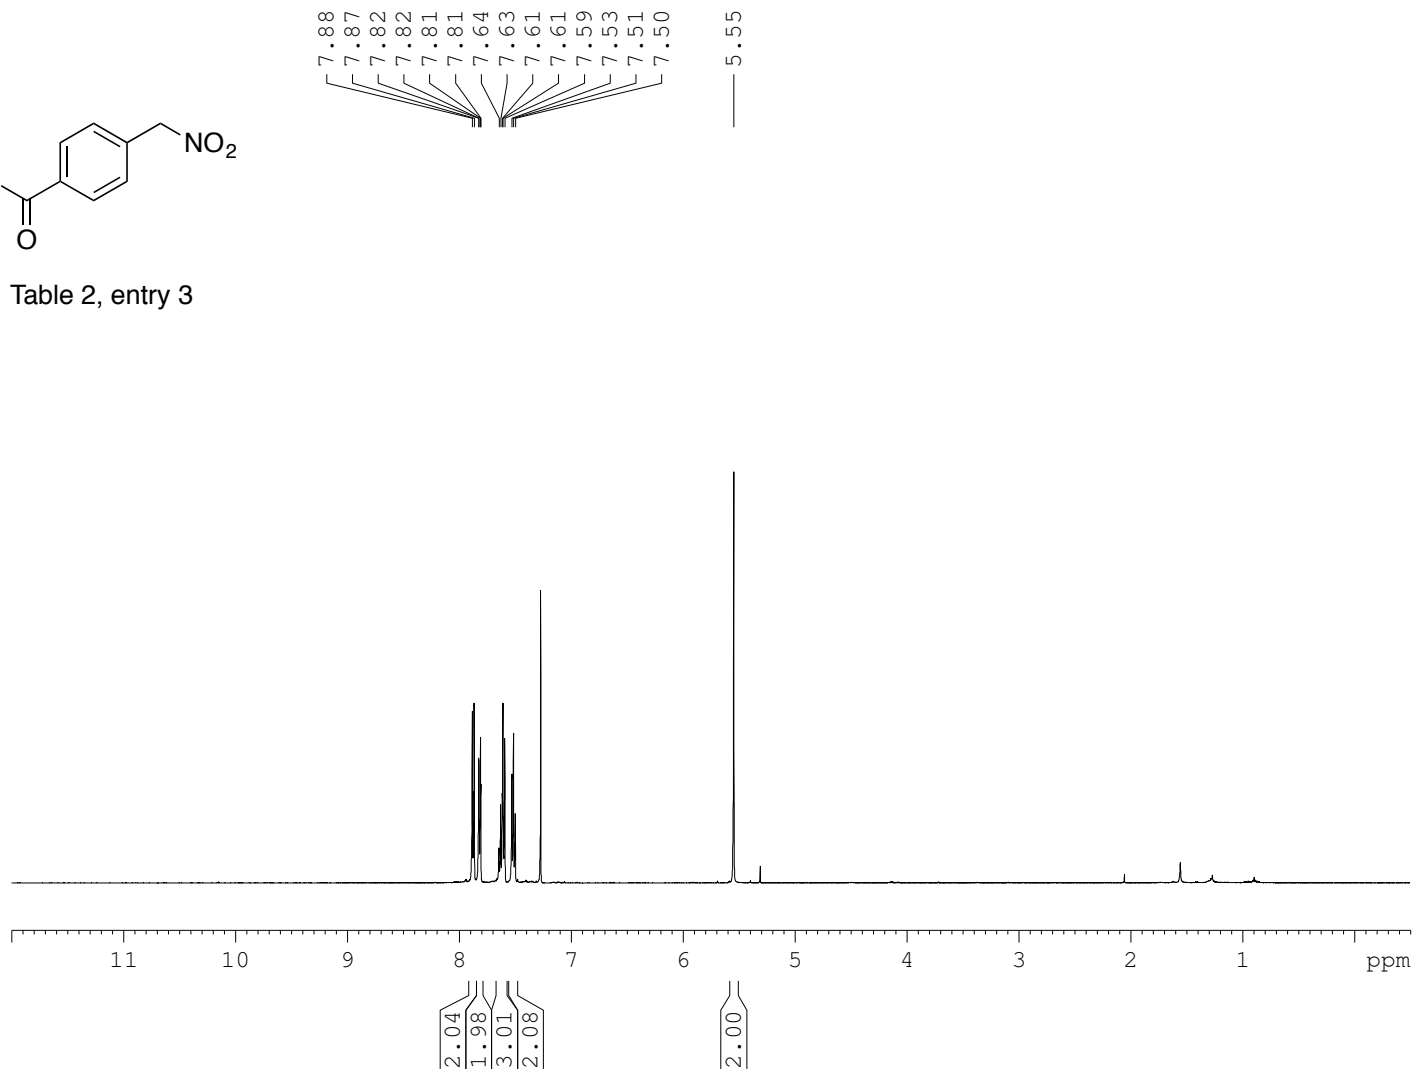

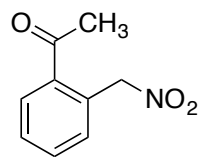

Table 2, entry 4

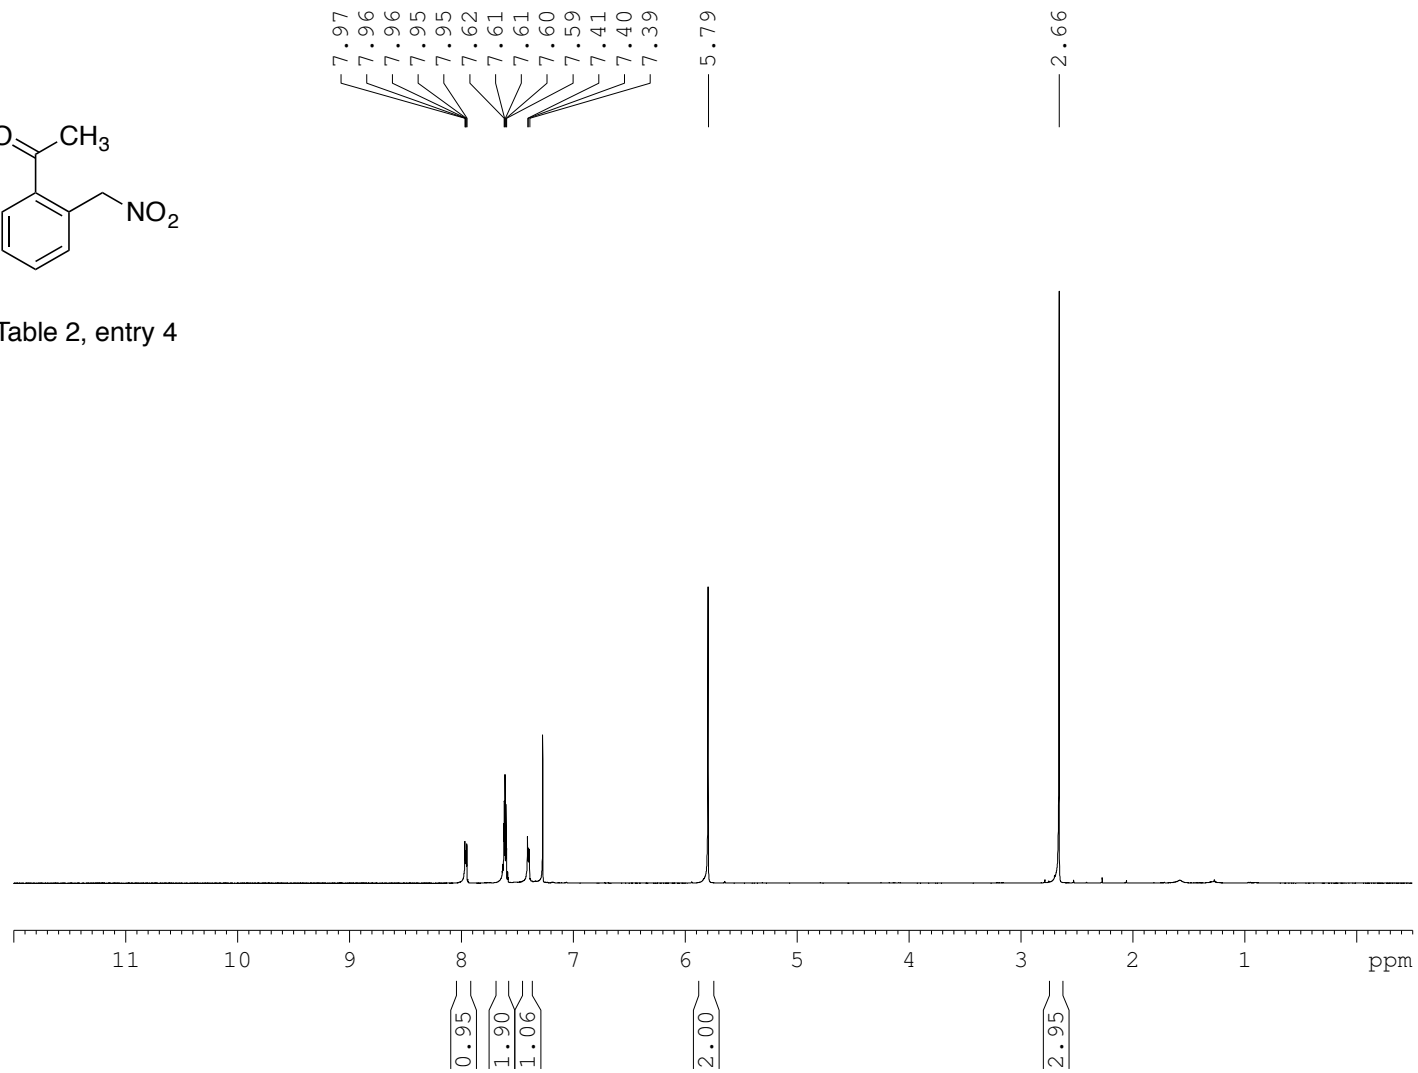



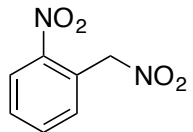

Table 2, entry 5

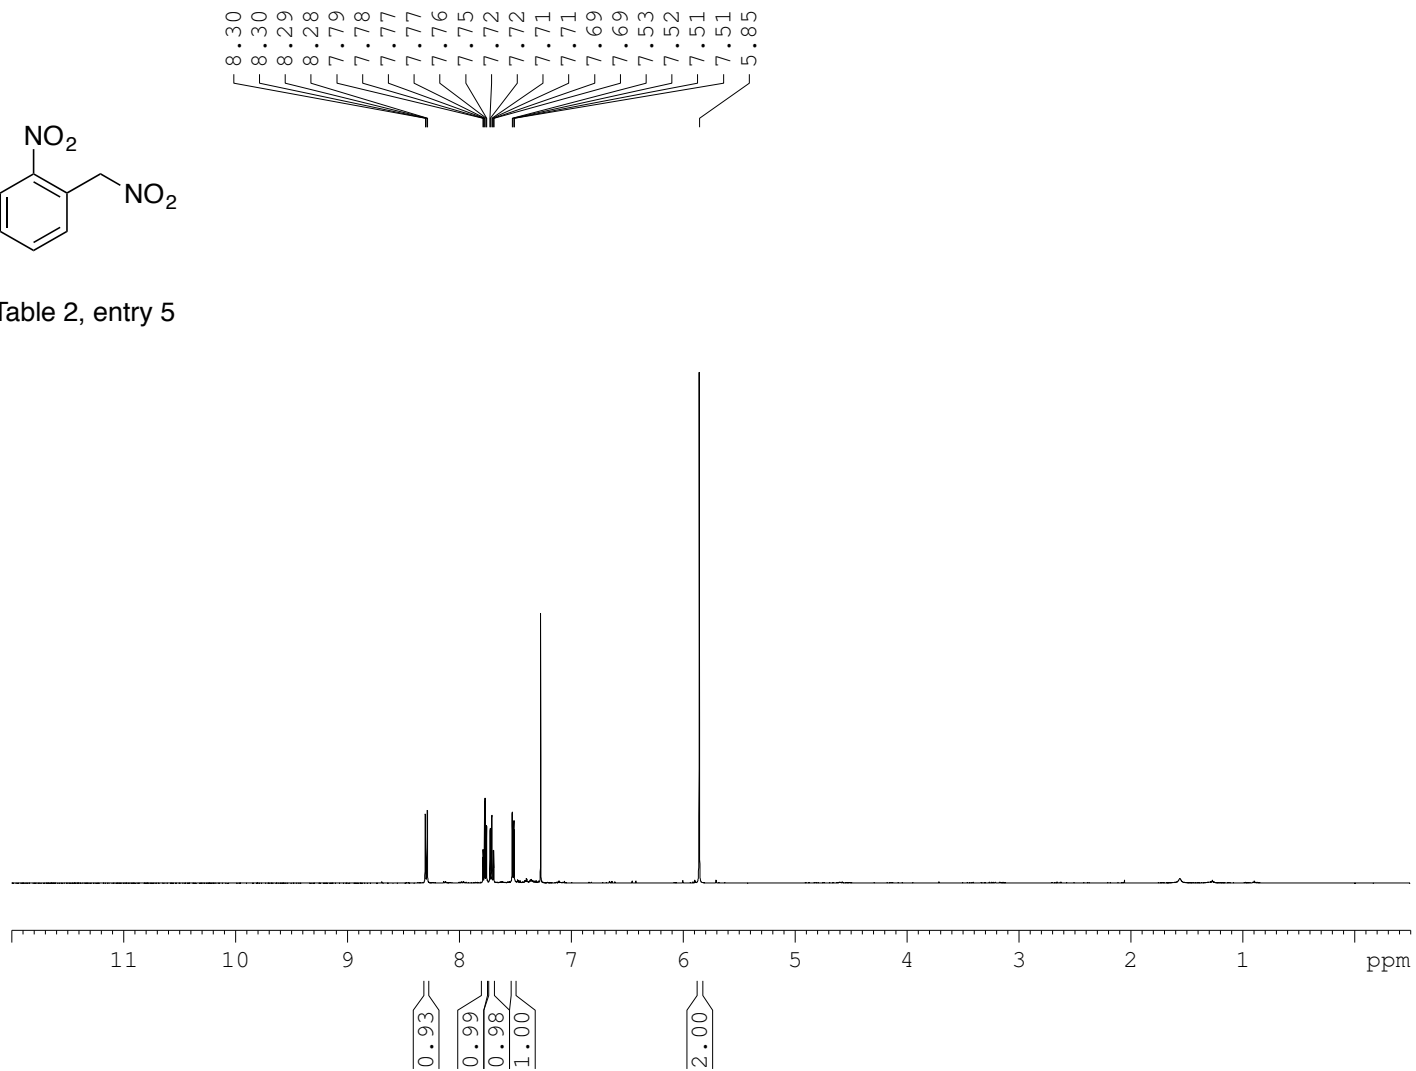

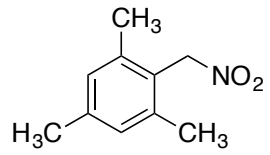

Table 2, entry 6

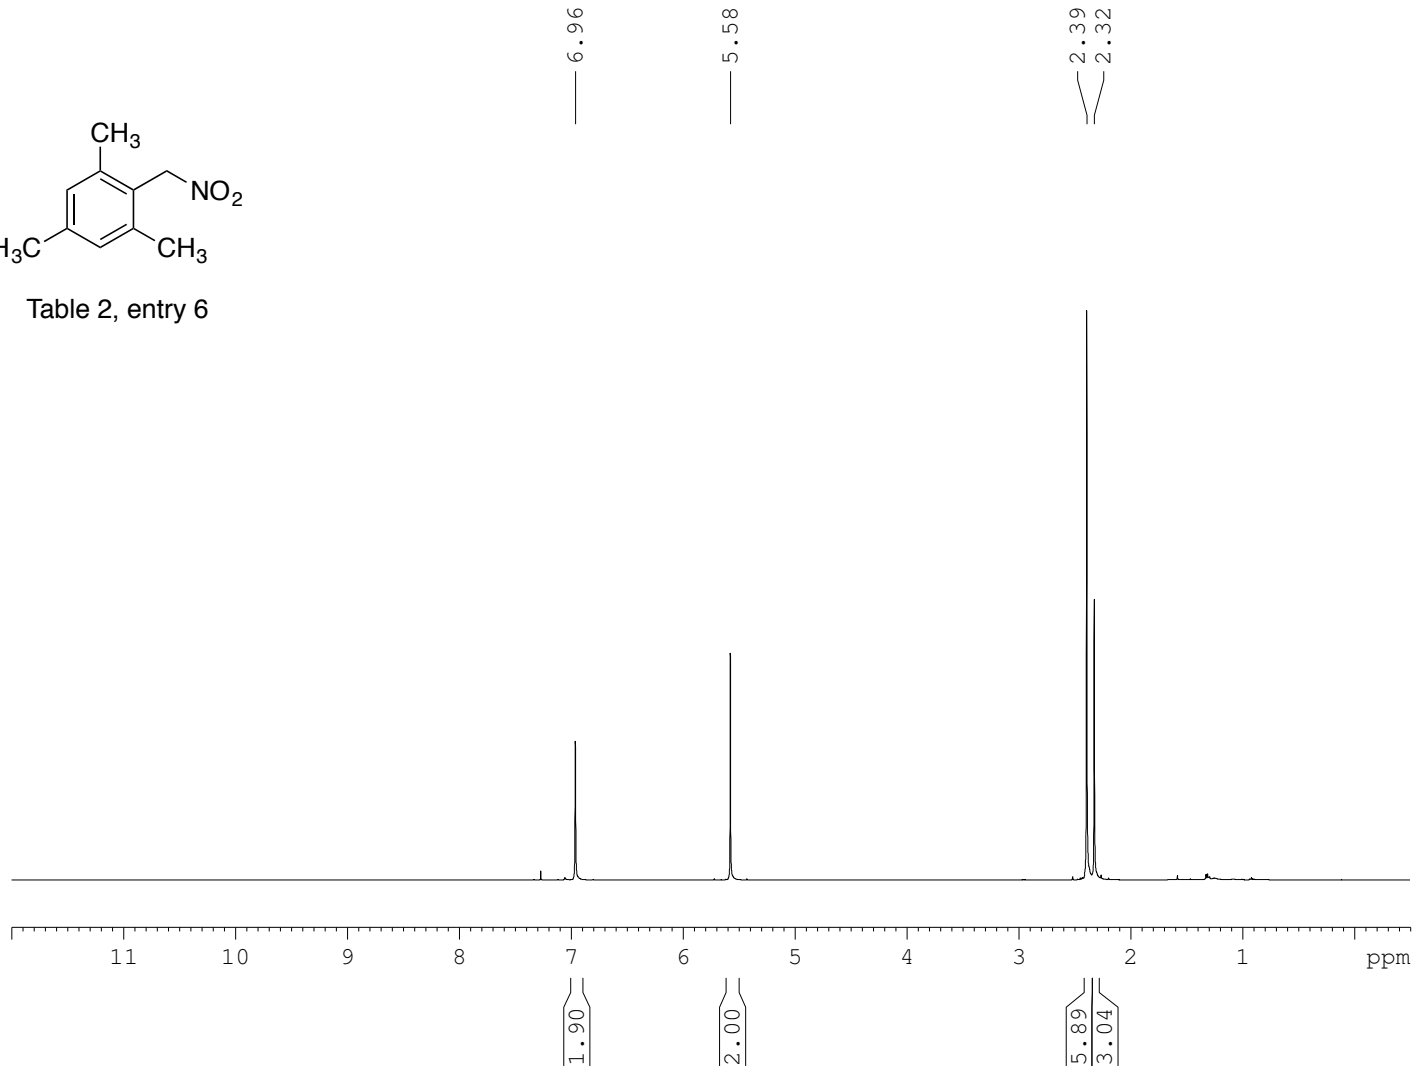

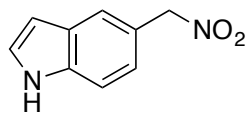

Table 2, entry 7

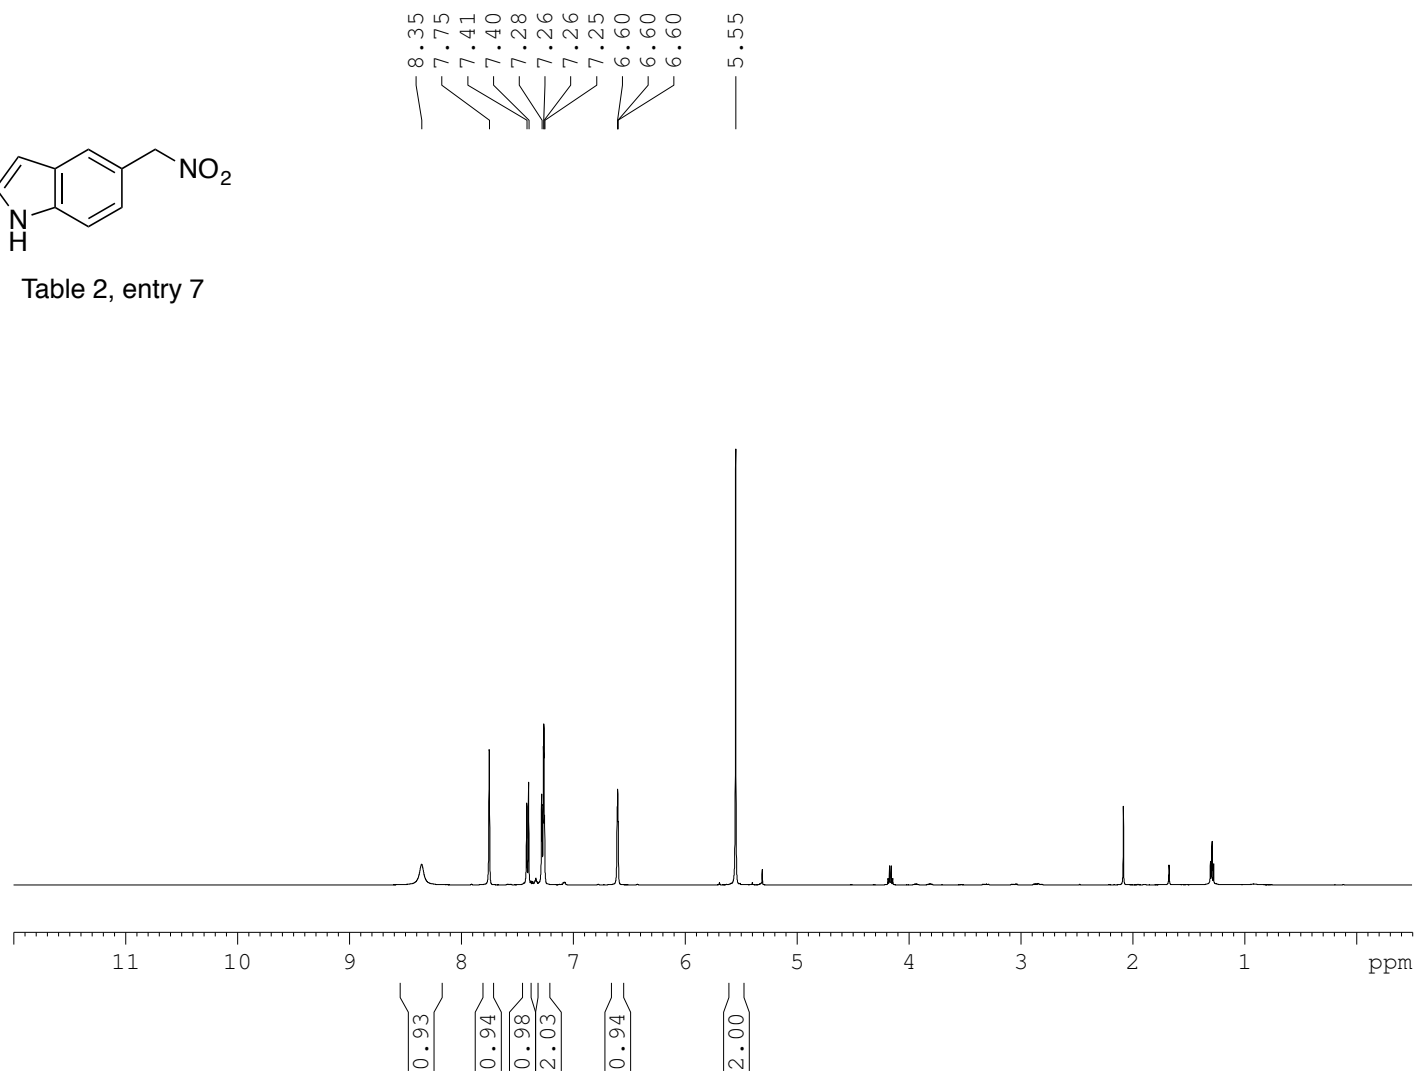

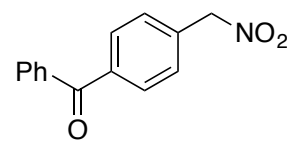

Table 2, entry 8

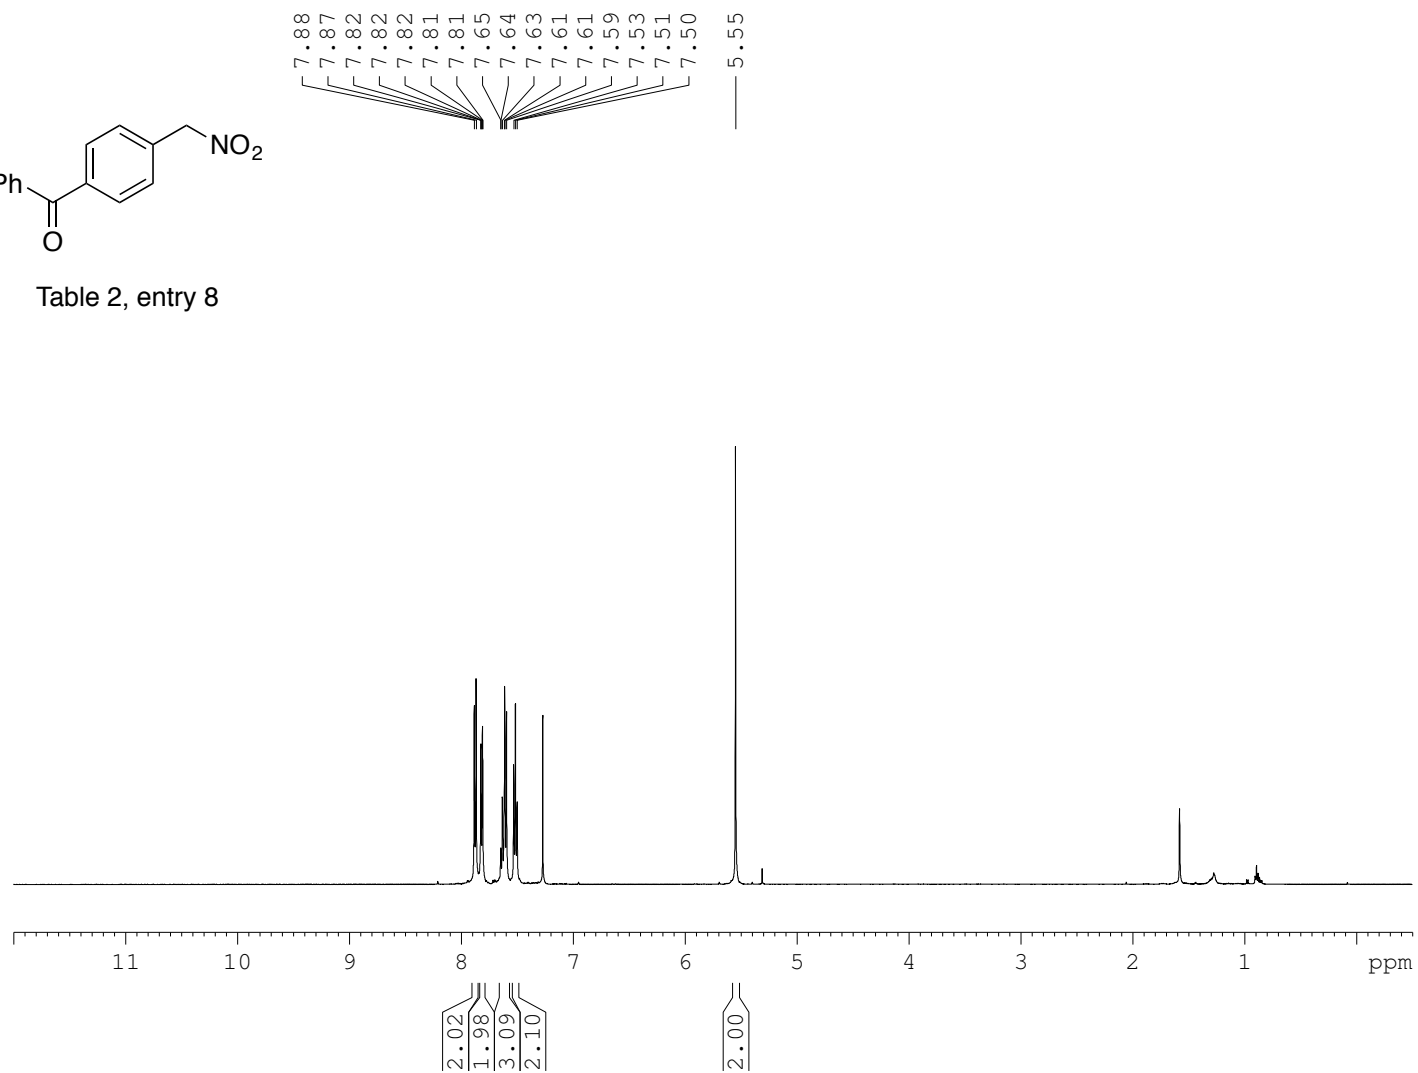

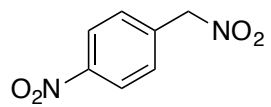

Table 2, entry 9

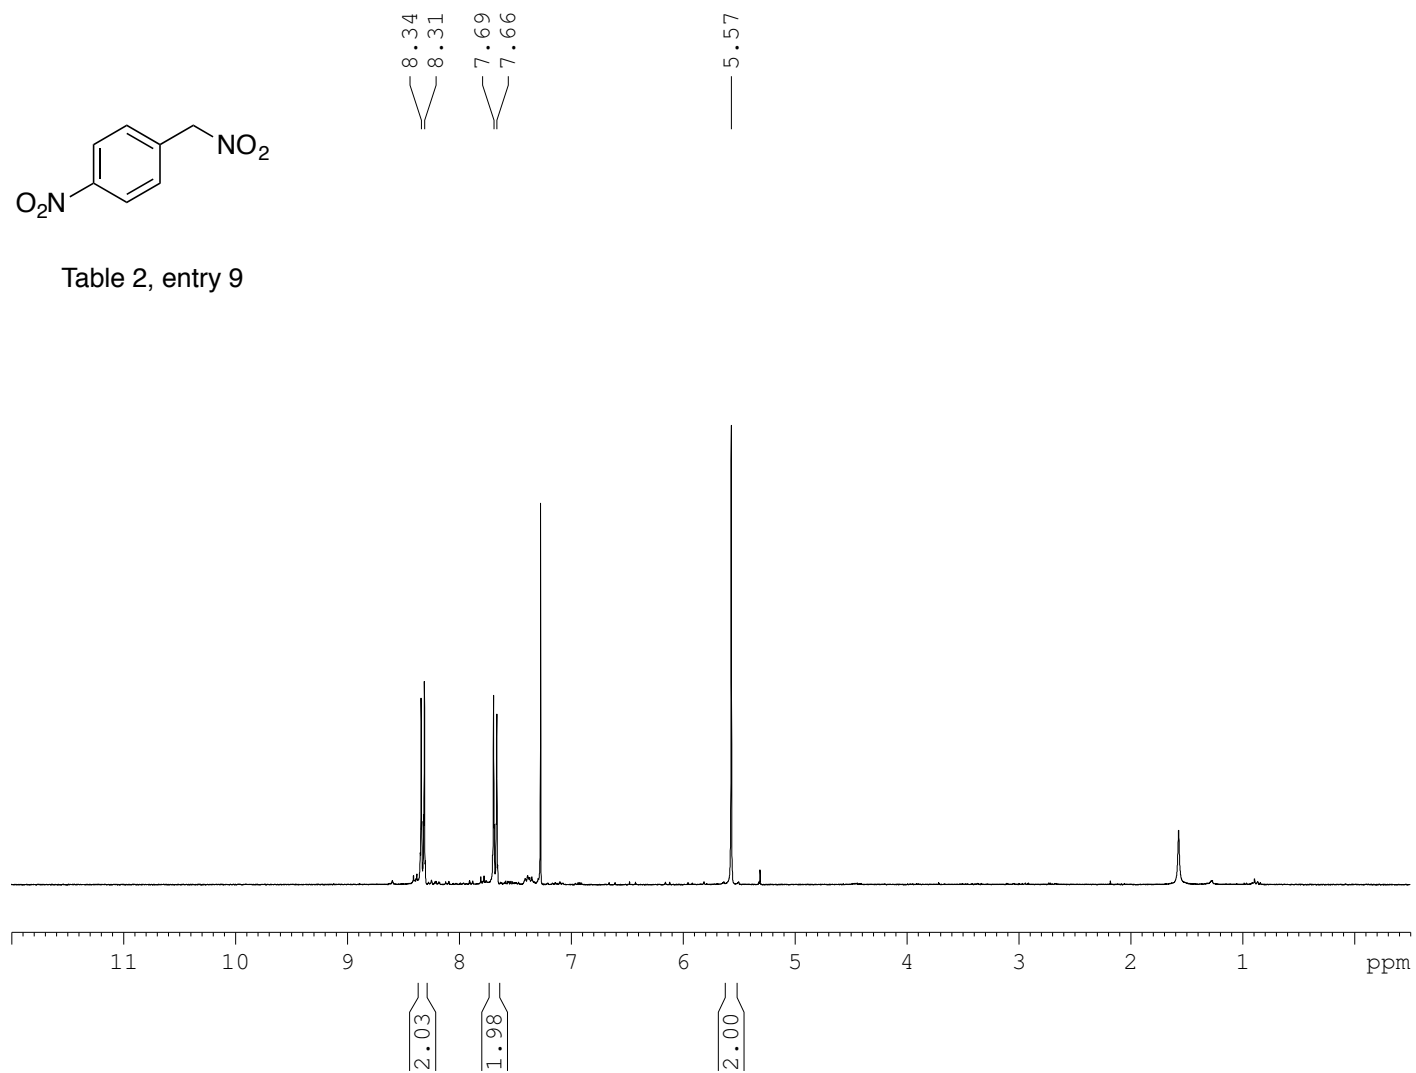

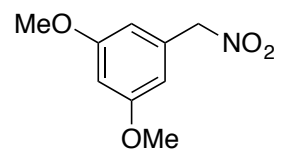

Table 2, entry 10

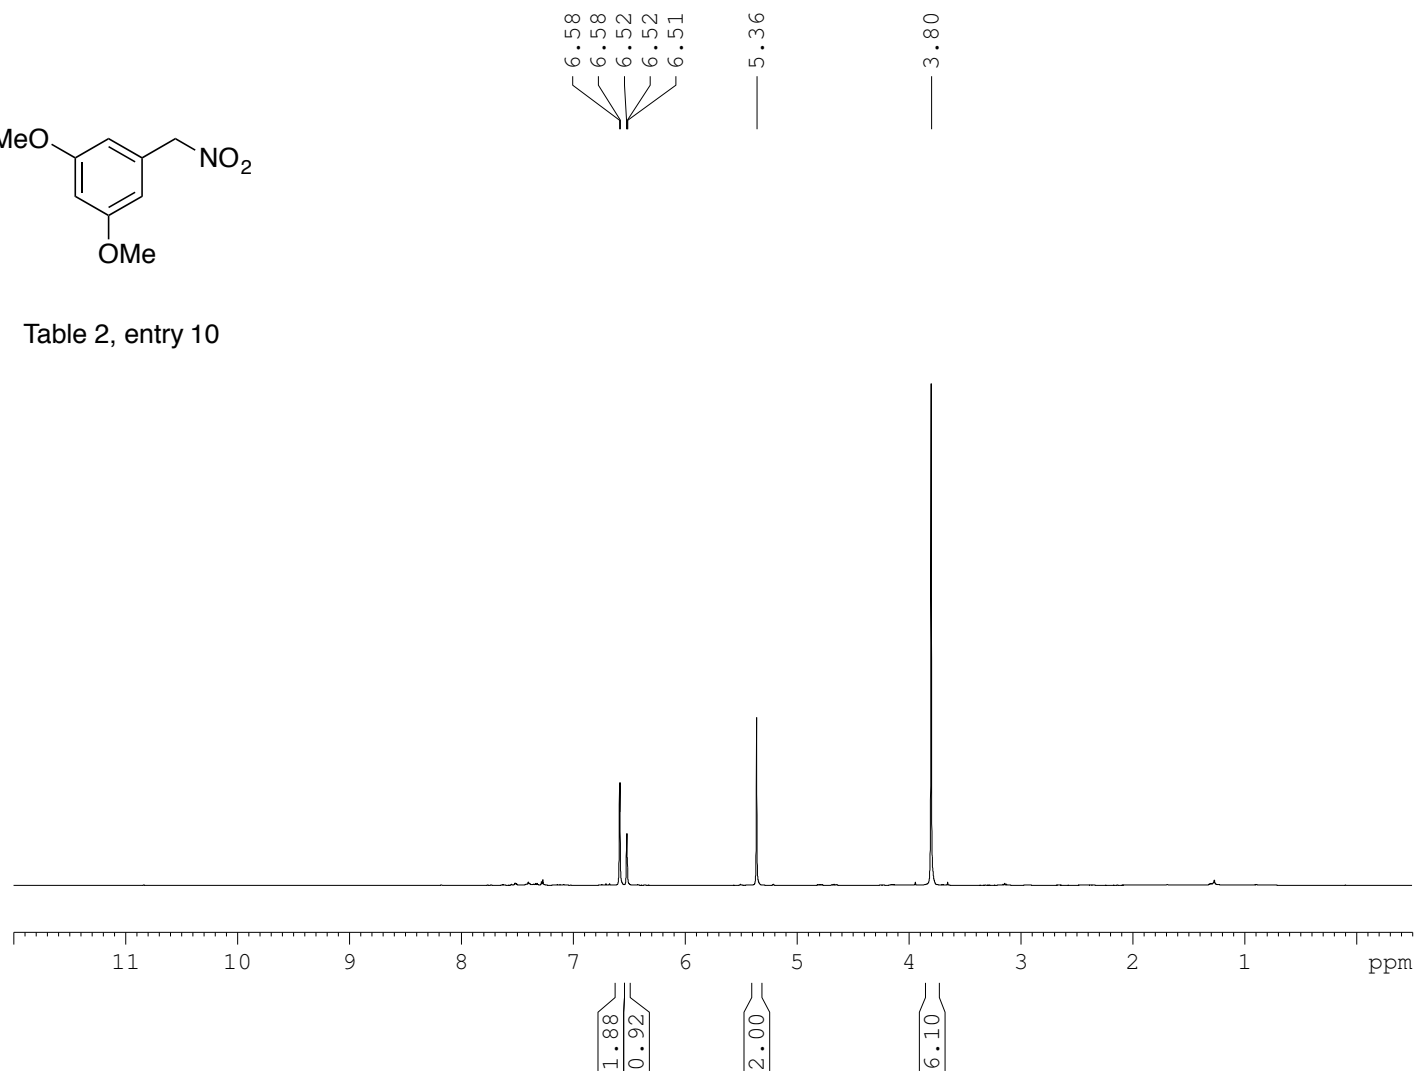

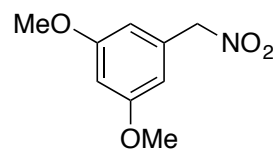

161.29  
131.62  
107.97  
101.90  
80.24  
55.59

Table 2, entry 10

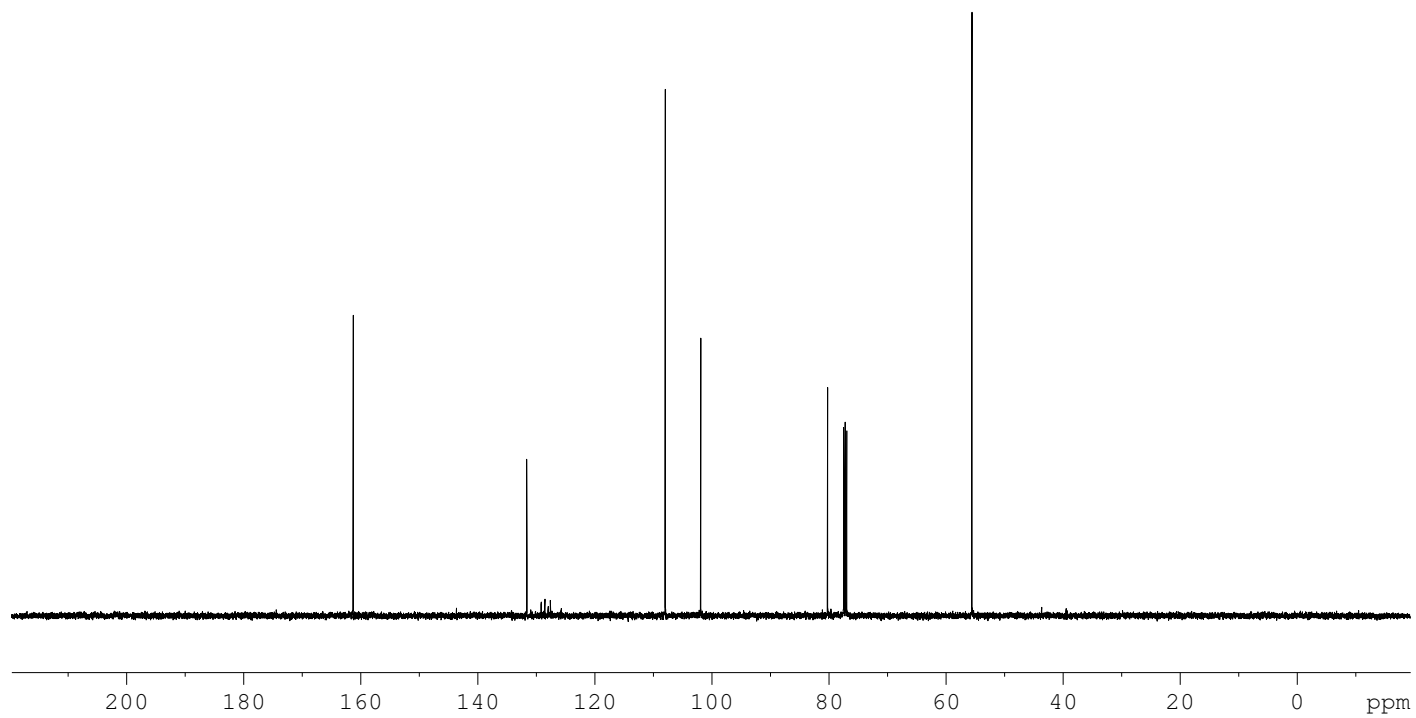

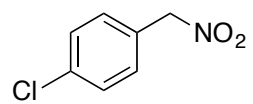

Table 2, entry 11

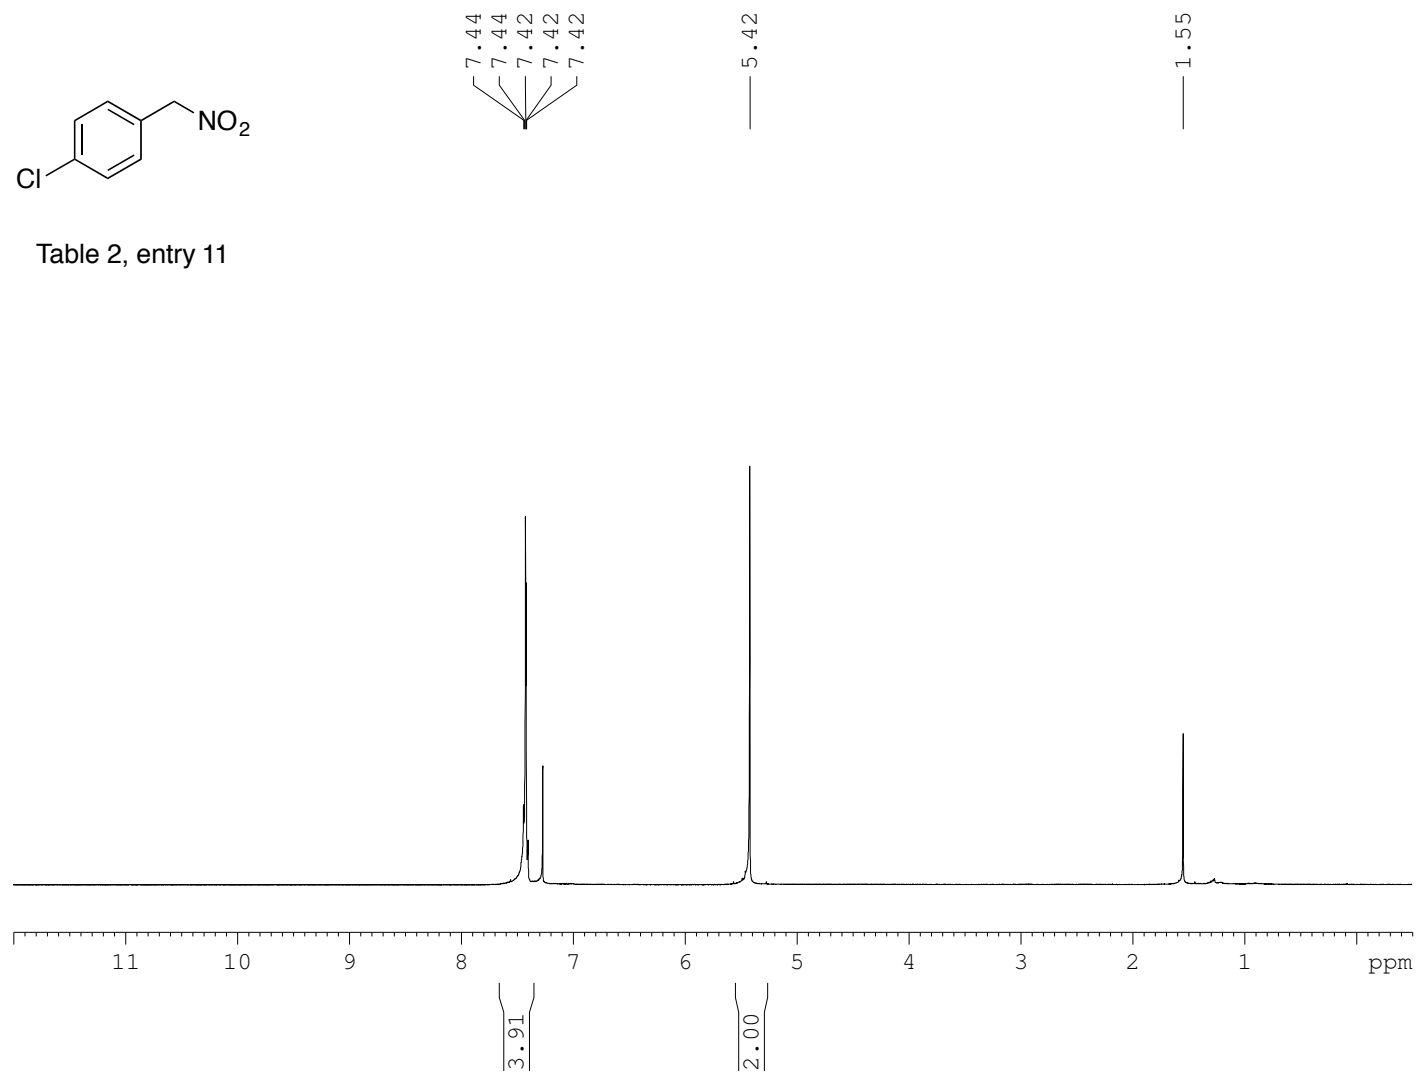



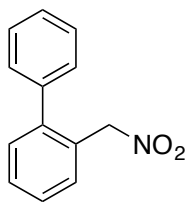

Table 2, entry 12

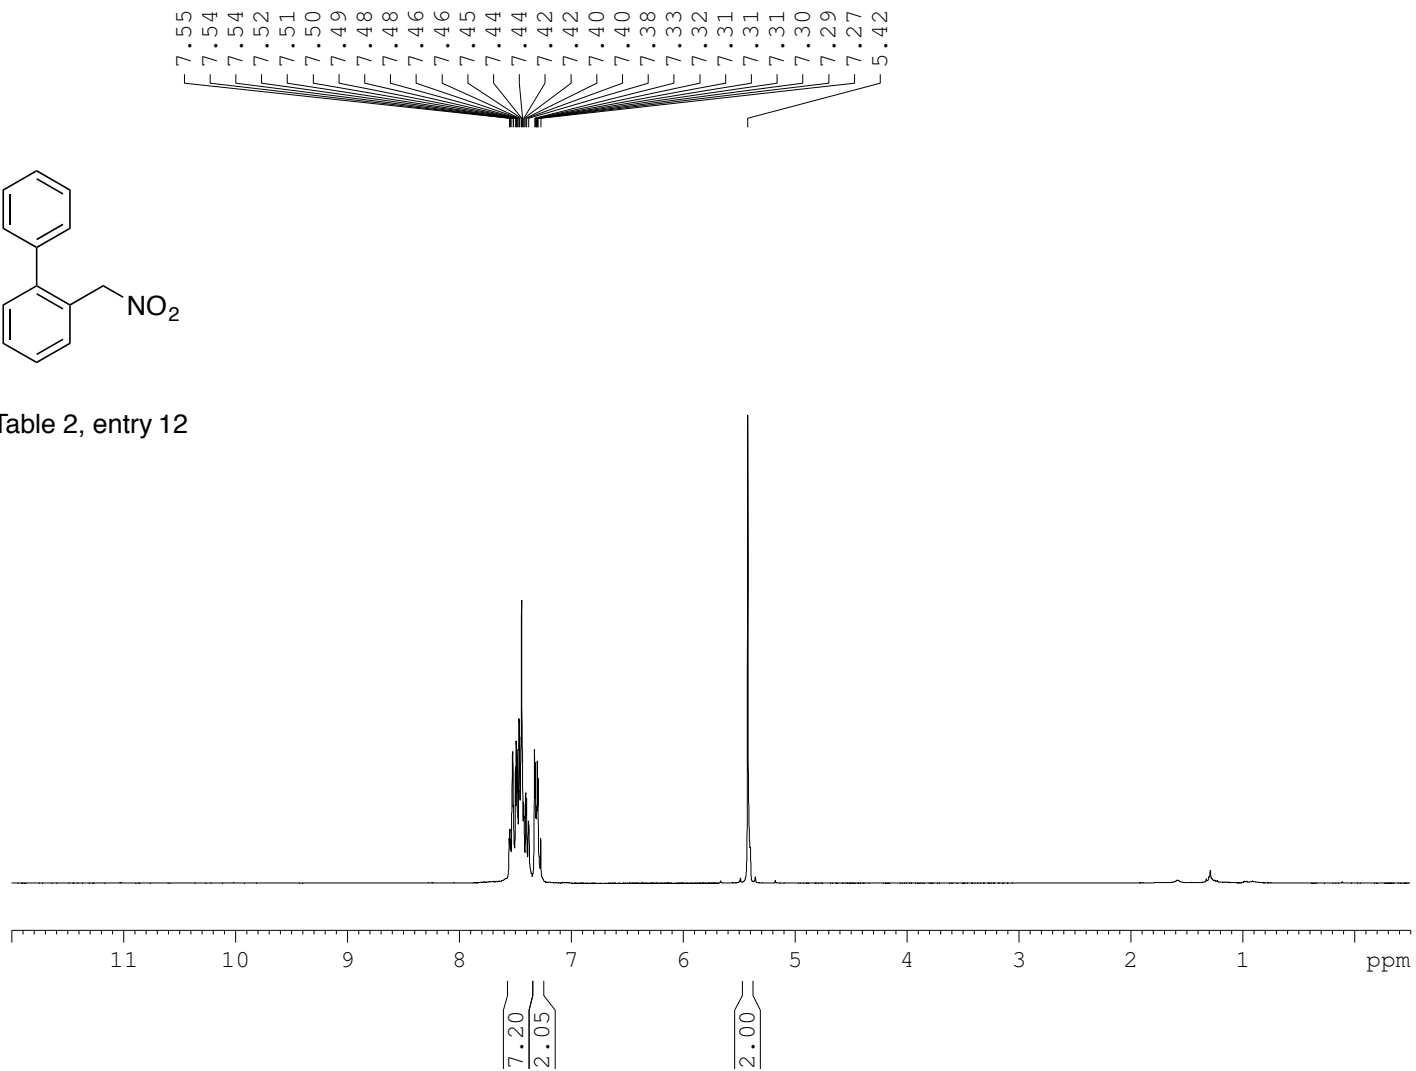

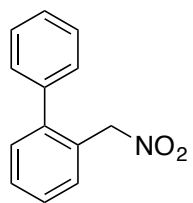

Table 2, entry 12

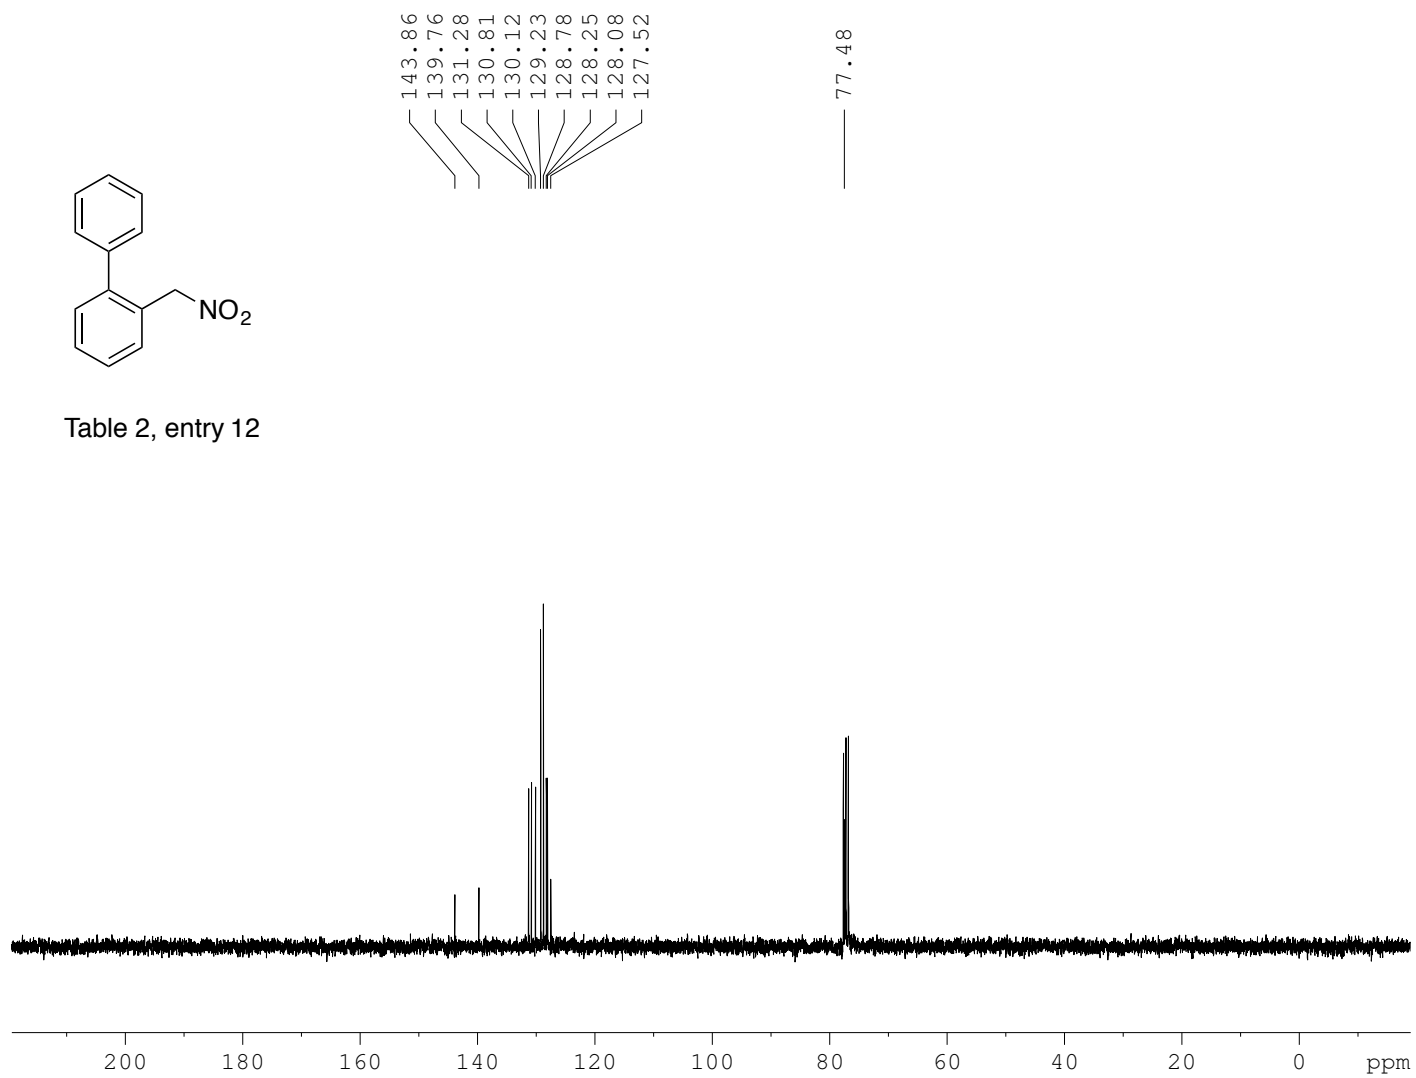

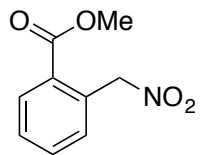

Table 2, entry 13

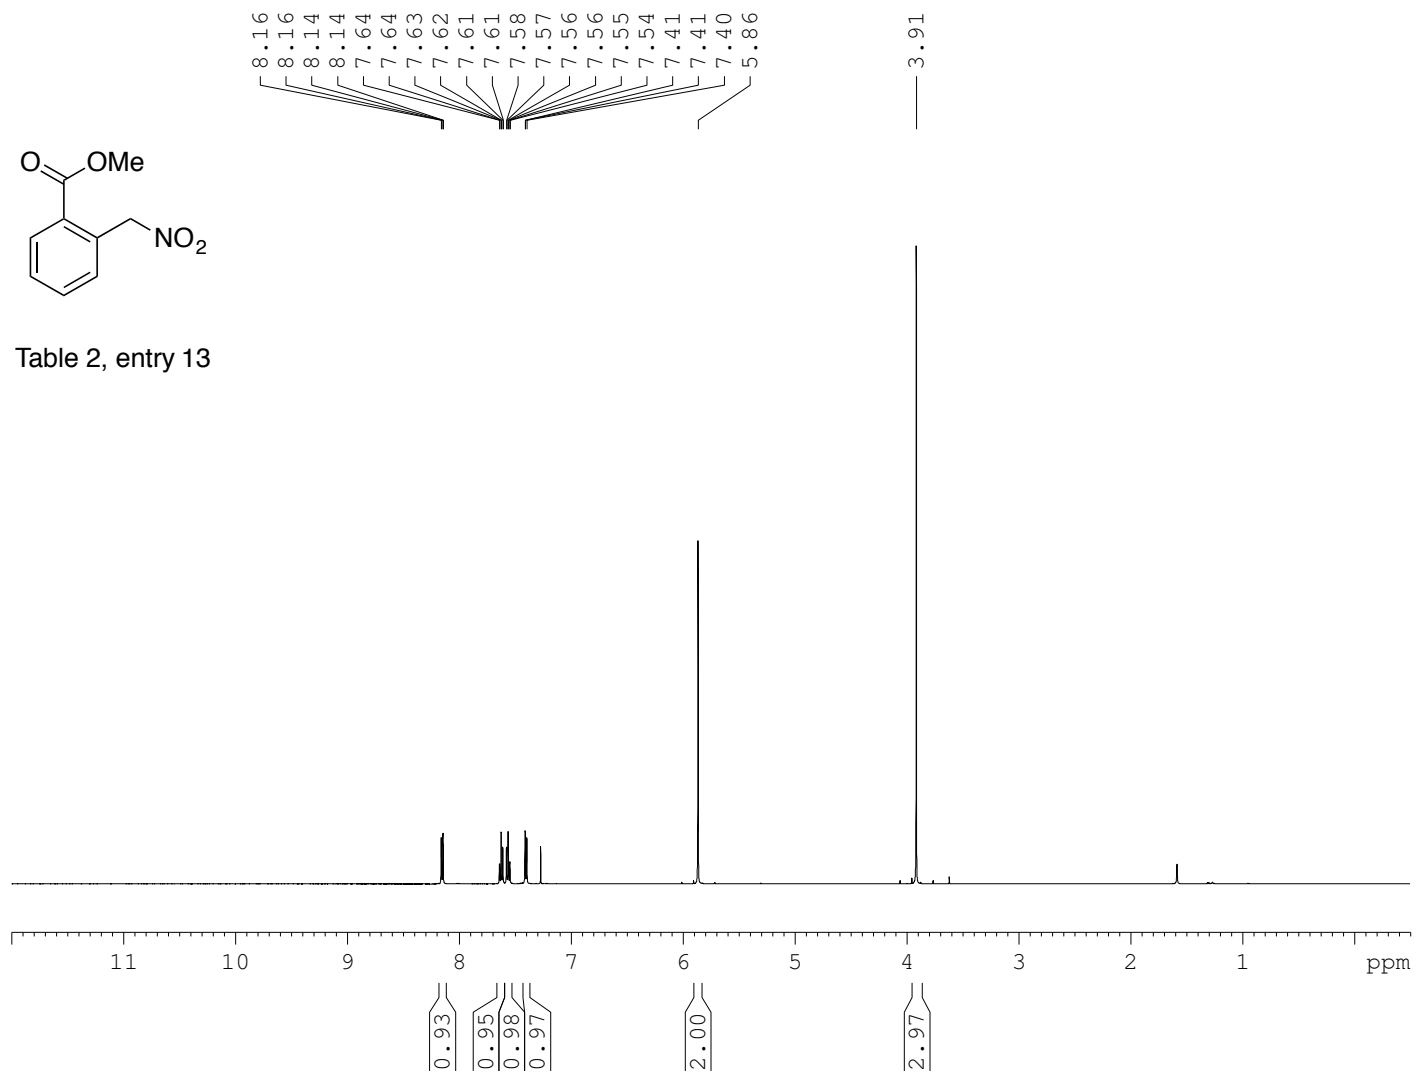



Table 2, entry 13

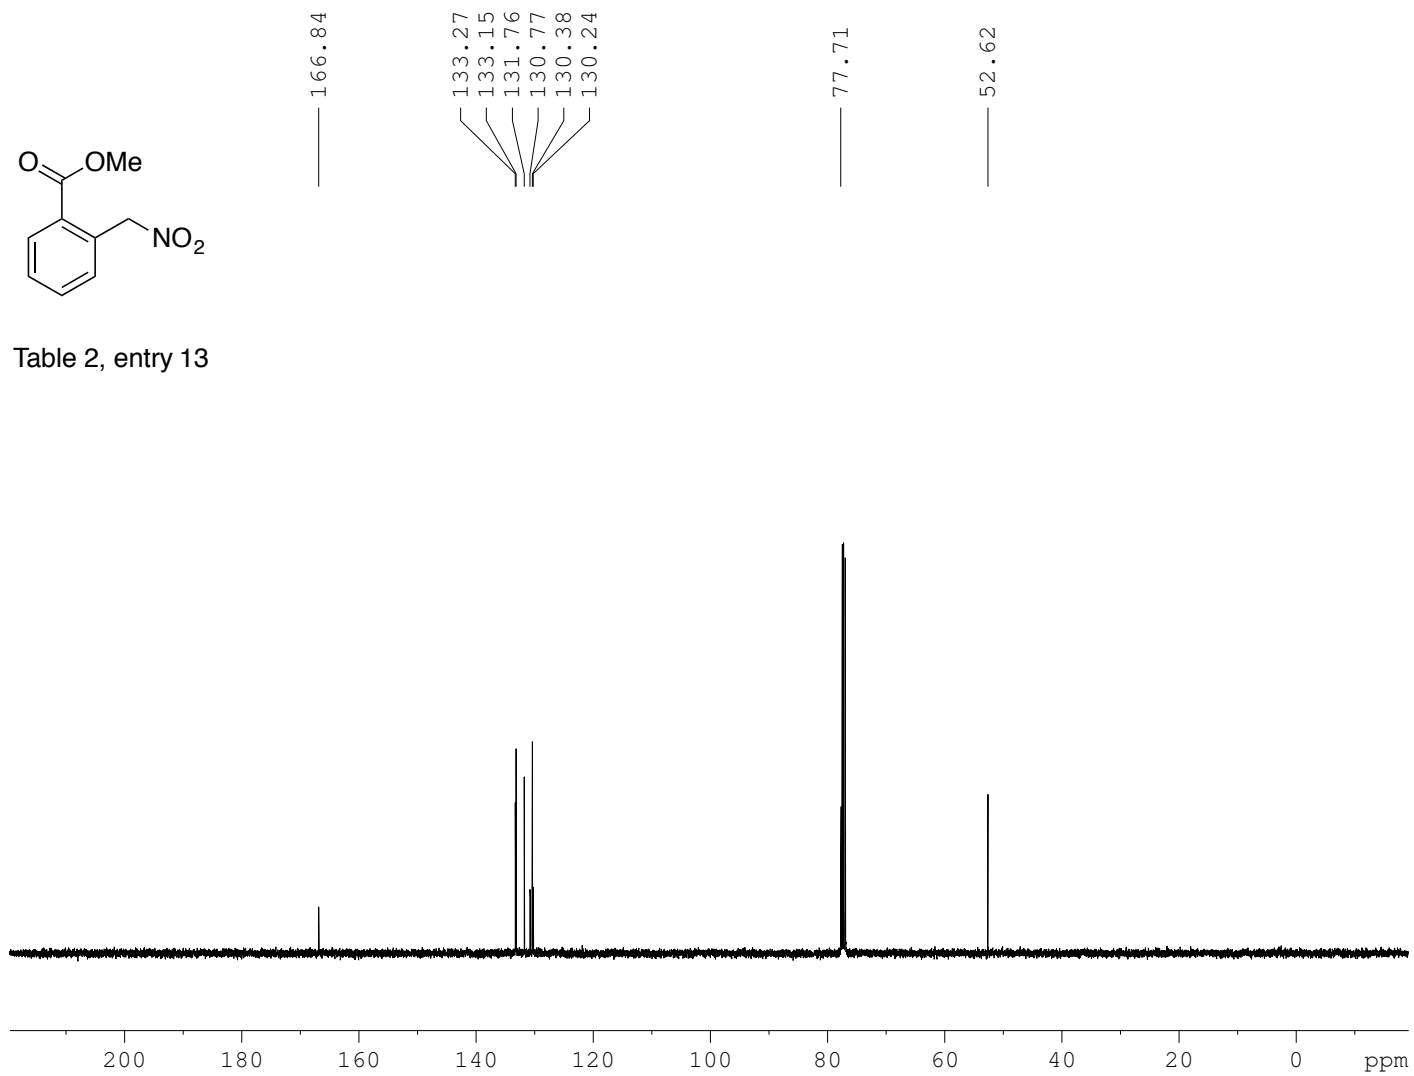

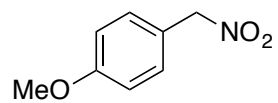

Table 3, entry 1

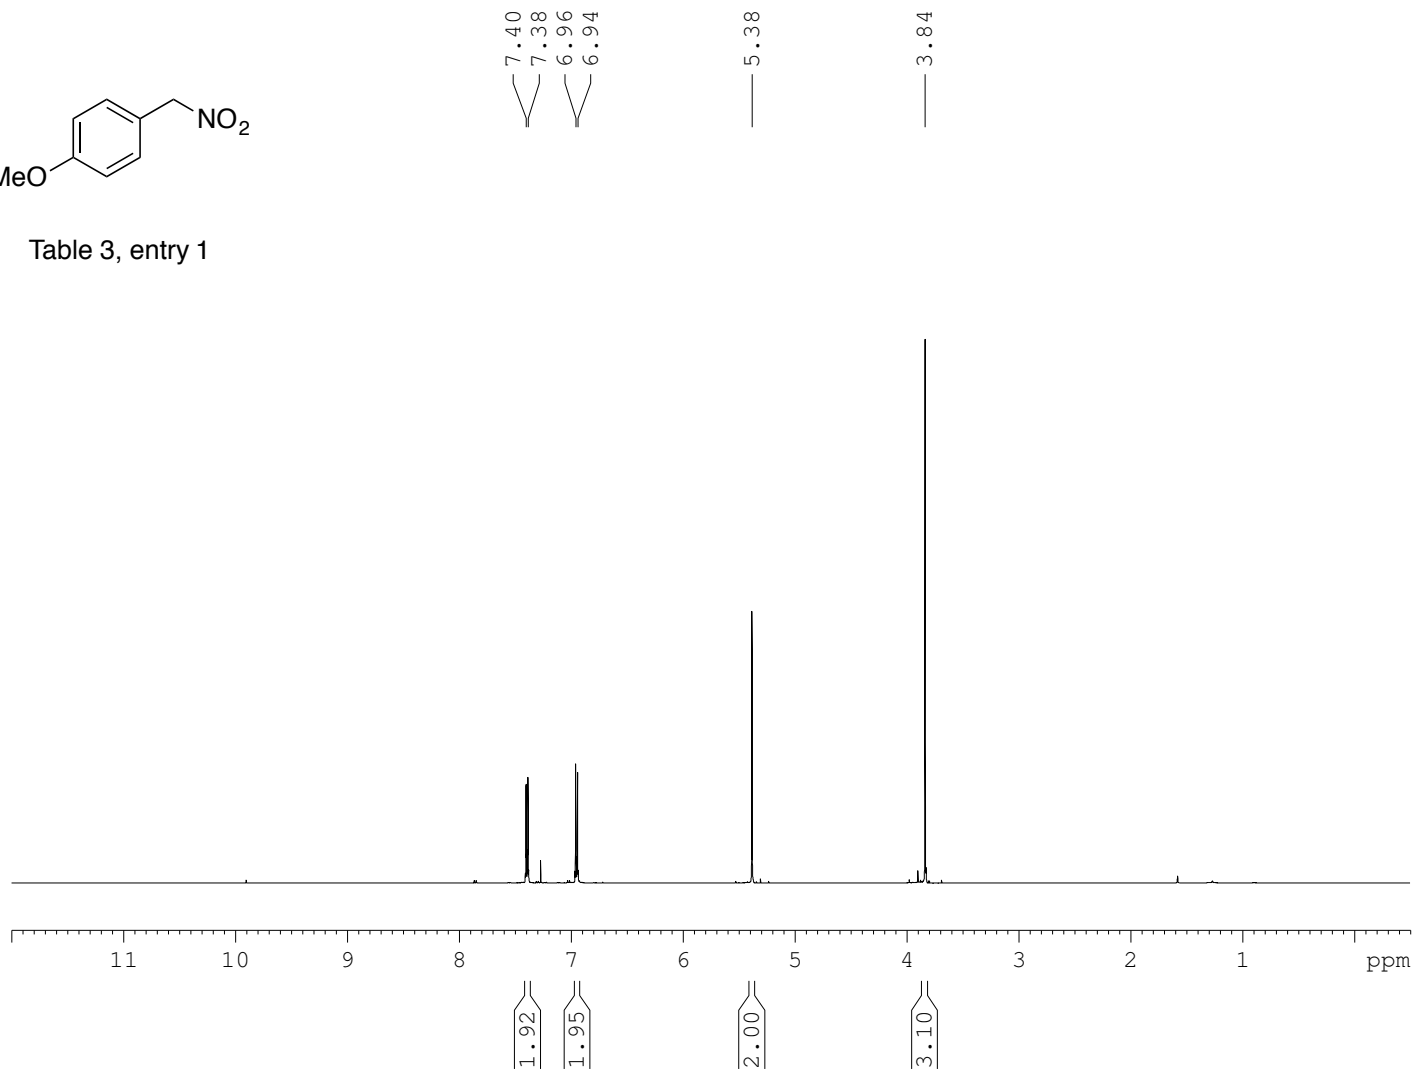

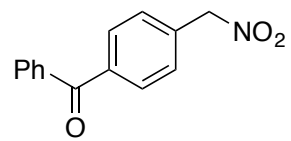

Table 3, entry 2

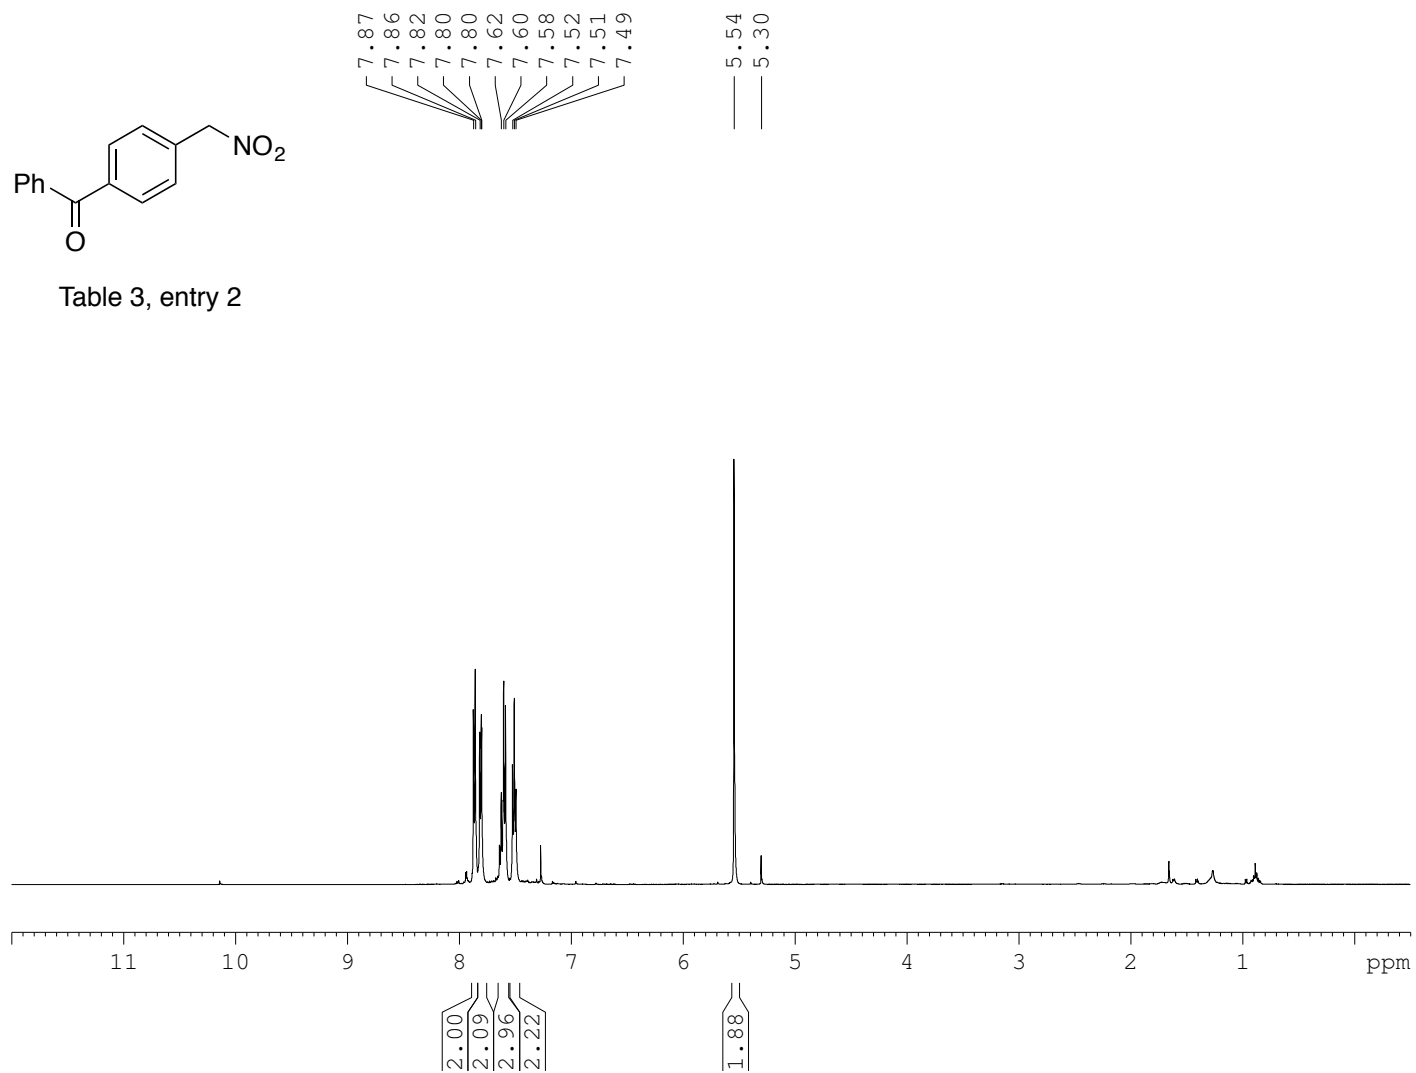

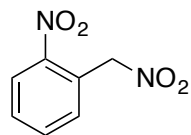

Table 3, entry 3

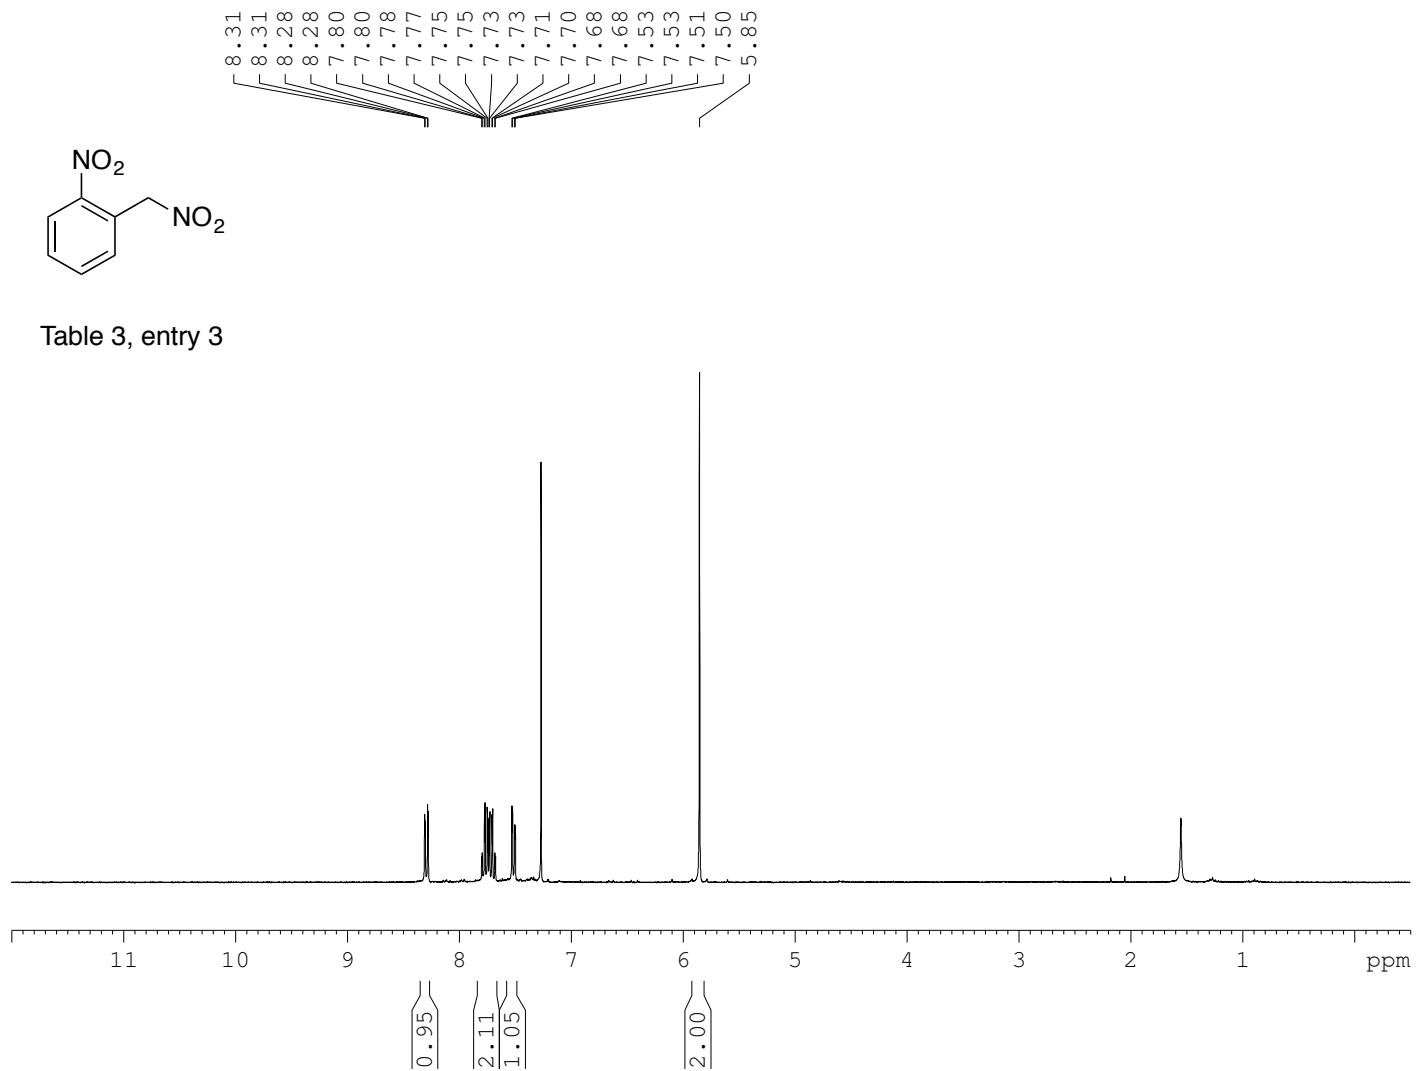

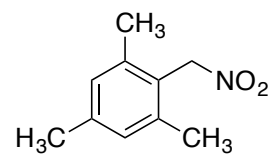

Table 3, entry 4

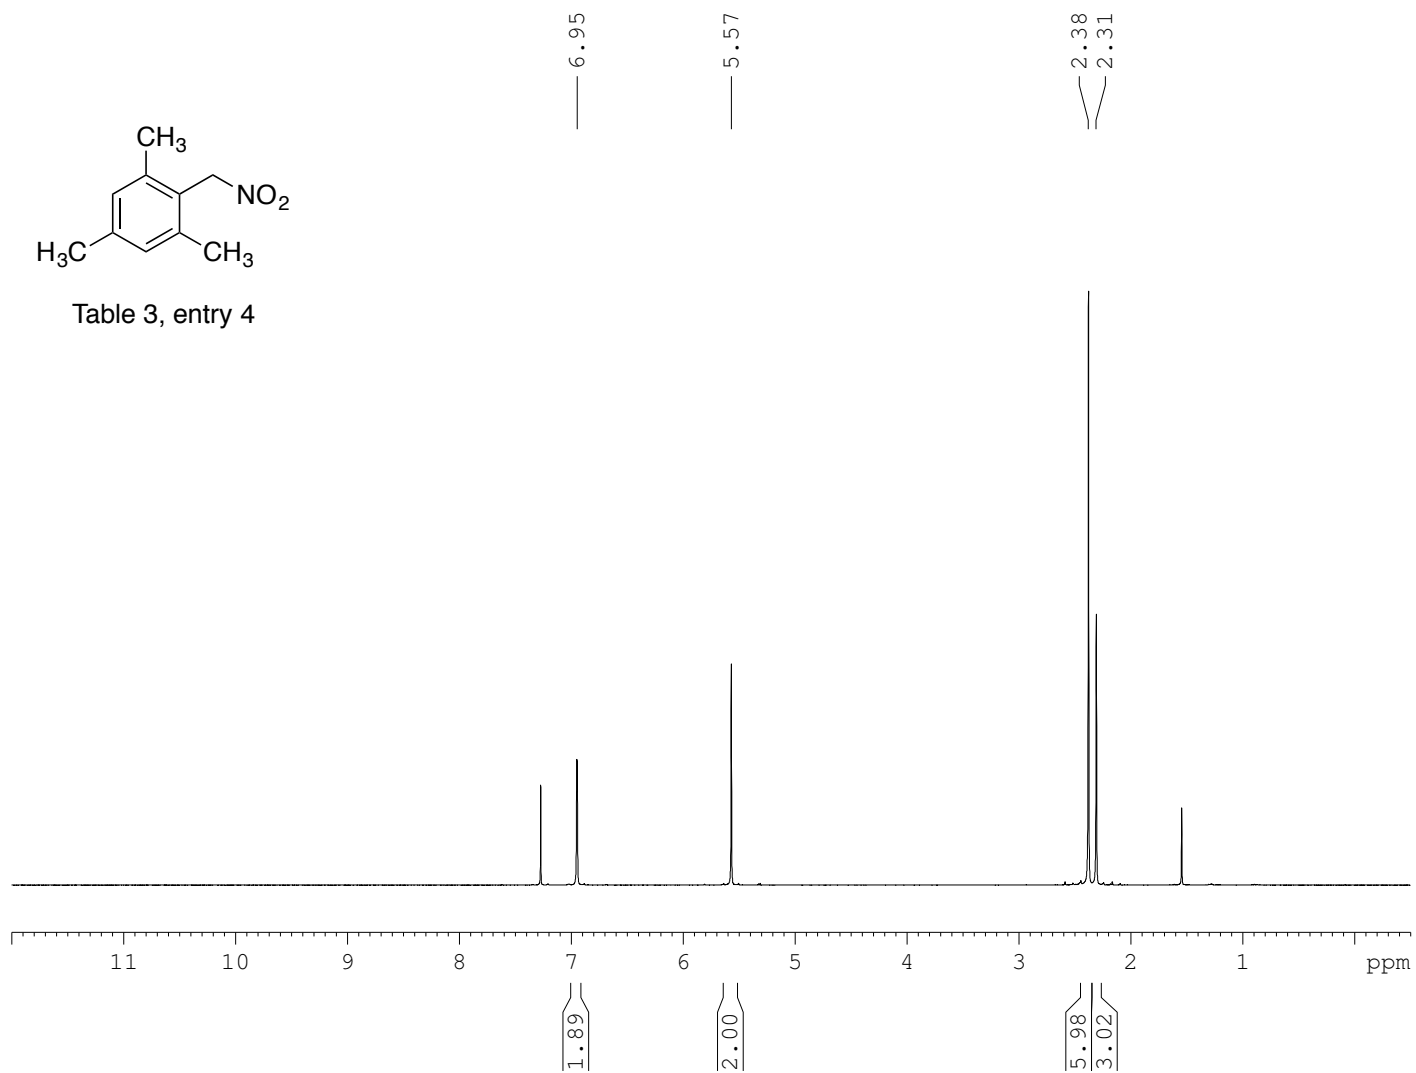



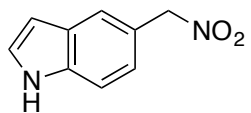

Table 3, entry 5

8.34  
7.75  
7.42  
7.41  
7.28  
7.28  
7.27  
7.26  
6.61  
6.61  
6.60  
6.60  
5.55

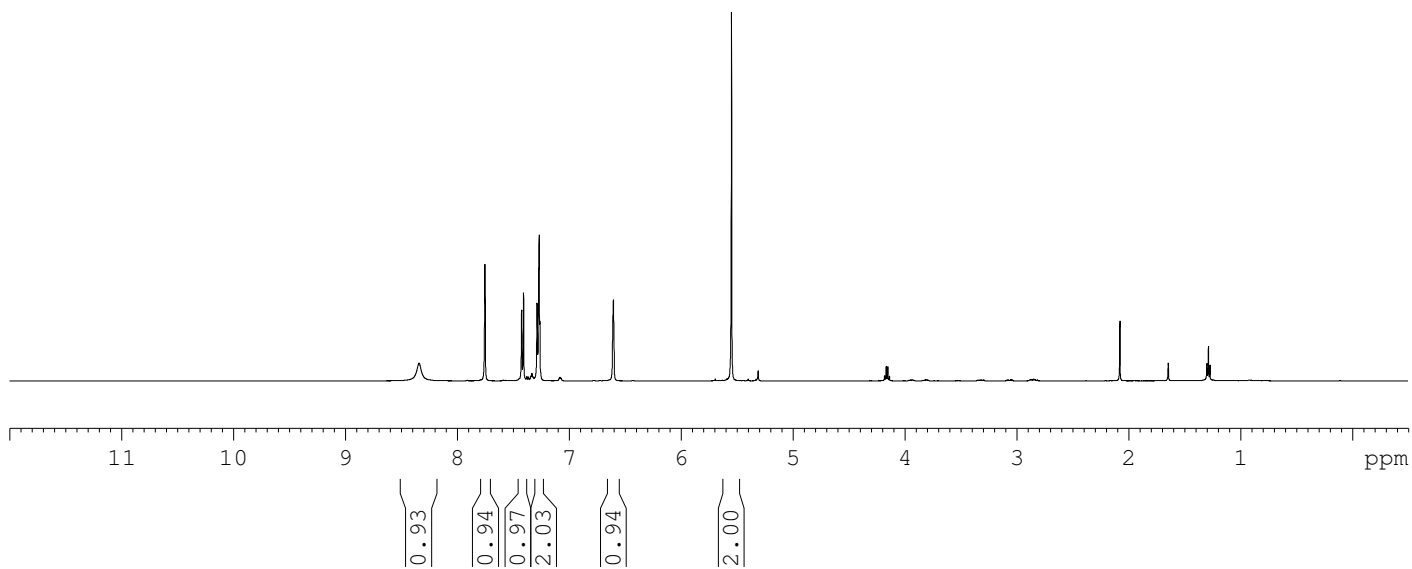

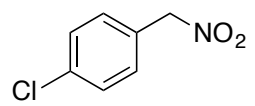

Table 3, entry 6

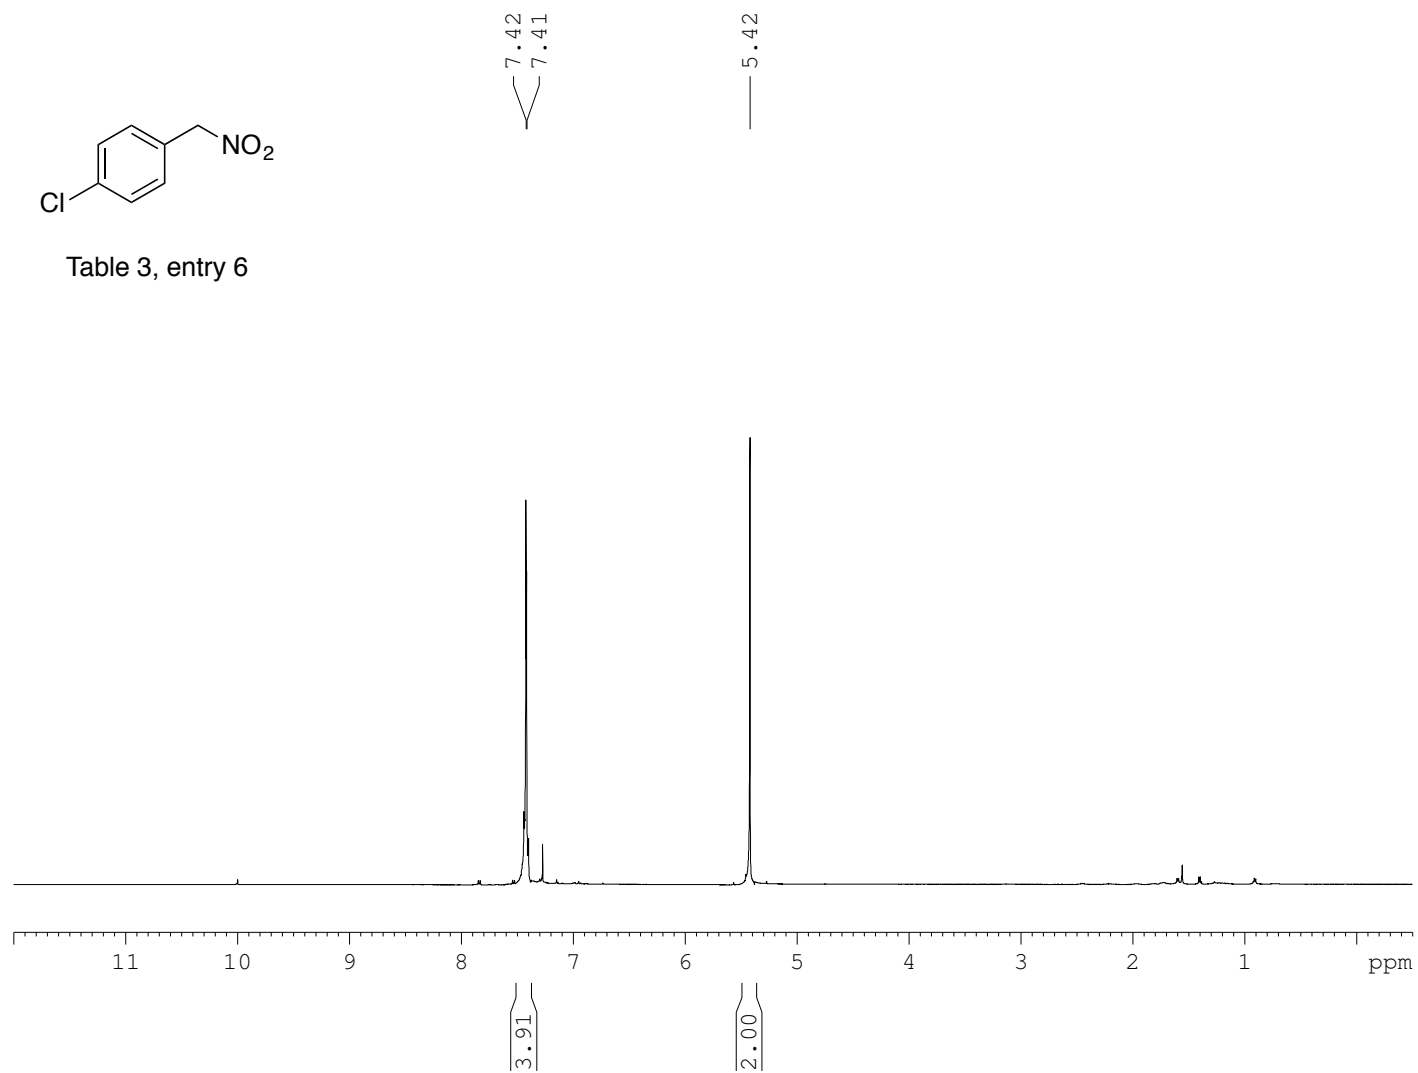

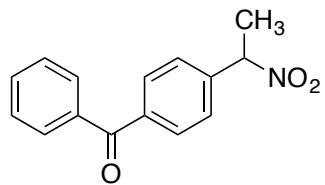

Scheme 3

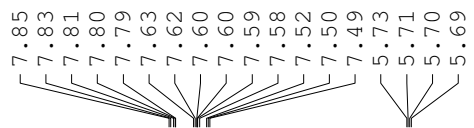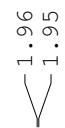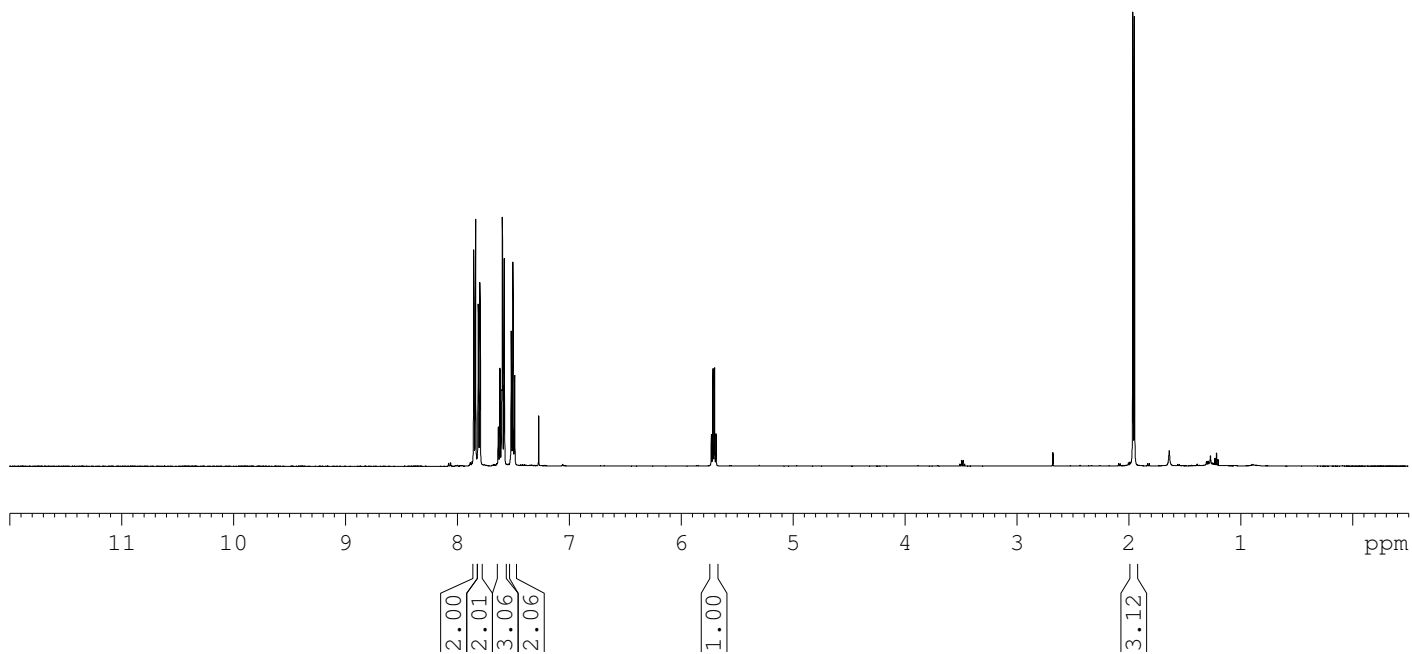

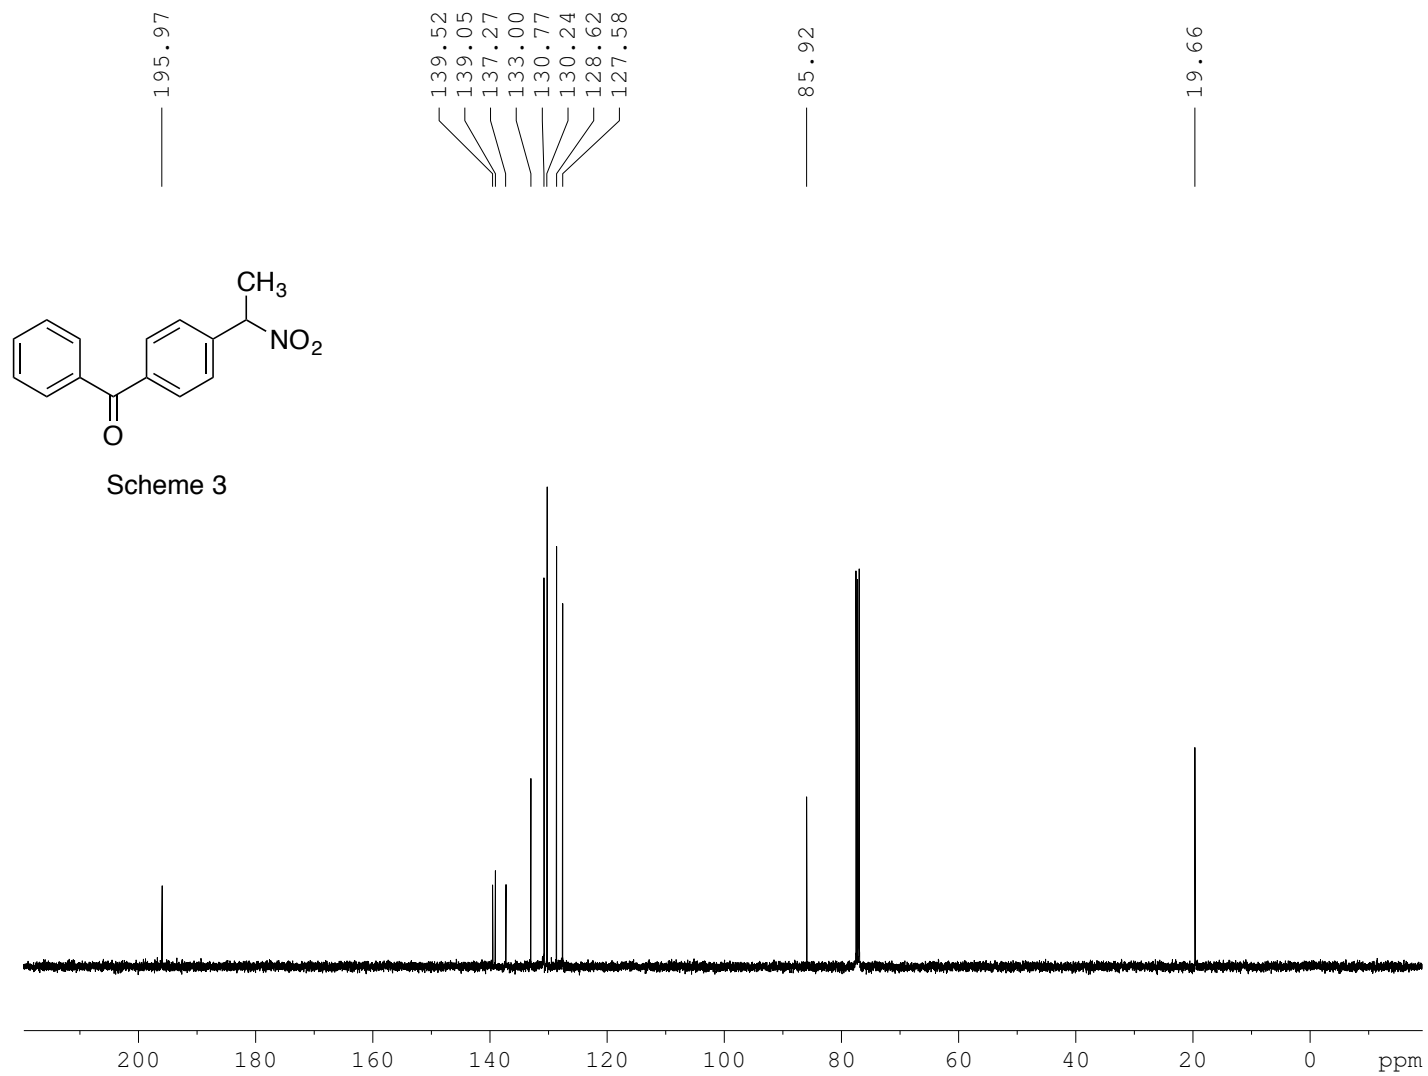

Supplement: NIHMS513605-supplement-1_si_001.pdf [file NIHMS513605-supplement-1_si_001.pdf]
